# Supplementary material for: Nucleophilic dearomatization of 4-aza-6-nitrobenzofuroxan by CH acids in the synthesis of pharmacology-oriented compounds
Source: publisher site journal article supplement (doi:10.3762/bjoc.13.277), 2017-12-21

# Supporting Information

for

## **Nucleophilic dearomatization of 4-aza-6-nitrobenzofuroxan by CH acids in the synthesis of pharmacology-oriented compounds**

Alexey M. Starosotnikov\*<sup>1</sup>, Dmitry V. Shkaev<sup>1</sup>, Maxim A. Bastrakov<sup>1</sup>, Ivan V. Fedyanin<sup>2</sup>, Svyatoslav A. Shevelev<sup>1</sup> and Igor L. Dalinger<sup>1</sup>

Address: <sup>1</sup>N.D. Zelinsky Institute of Organic Chemistry, Leninsky prosp. 47, Moscow 119991, Russia and <sup>2</sup>A.N. Nesmeyanov Institute of Organoelement Compounds, Vavilova str. 28, Moscow 119991, Russia

Email: Alexey M. Starosotnikov - alexey41@list.ru

\*Corresponding author

**Experimental section, NMR spectra, HRMS and X-ray analysis data**

## Experimental

**General.** All chemicals were of commercial grade and used directly without purification. Melting points were measured on a Stuart SMP 20 apparatus.  $^1\text{H}$  and  $^{13}\text{C}$  NMR spectra were recorded on a Bruker AM-300 spectrometer (at 300.13 and 75.13 MHz, respectively) in  $\text{DMSO-}d_6$  or  $\text{acetone-}d_6$  with TMS as internal standard. HRMS spectra were recorded on a Bruker micrOTOF II mass spectrometer using ESI. All reactions were monitored by TLC analysis using ALUGRAM SIL G/UV254 plates, which were visualized by UV light.

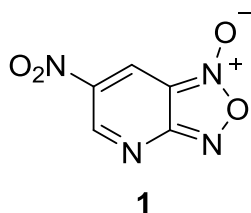

### 4-Aza-6-nitrobenzofuroxan (**1**)

2-Chloro-3,5-dinitropyridine (22.3 g, 0.11 mol) was added in small portions to a solution of  $\text{NH}_3$  in MeOH (7N, 150 mL) at 5–10 °C. The mixture was stirred for 1 h at room temperature and poured in water (500 mL). The resulting solid was filtered, washed with water (100 mL) and dried to give 2-amino-3,5-dinitropyridine (19.55 g, 97%) which was used in next step without further purification.

To a solution of 2-amino-3,5-dinitropyridine (5 g, 27.2 mmol) in benzene (100 mL)  $\text{PhI}(\text{OAc})_2$  (11.37 g, 35.3 mmol) was added and the mixture was heated under reflux for 5 h. The solvent was evaporated and the residue was washed thoroughly with hexane and ether to give 4-aza-6-nitrobenzofuroxan (**1**, 4.42 g, 90%) as yellow solid. M.p. 95–96 °C (lit. [26] 93–96 °C);  $^1\text{H}$  NMR ( $\text{DMSO-}d_6$ , 300 MHz): 9.35 (s, 1H), 9.48 (s, 1H).

### Reaction of ANBF **1** with CH acids (general procedure)

To a solution of ANBF (**1**, 0.364g, 2 mmol) in dry  $\text{CH}_3\text{CN}$  (10 mL) the corresponding CH acid (2 mmol) was added and the mixture was stirred for 30 min at room temperature. In

case of compounds **8** and **9** the precipitated product was filtered off and dried on air. In all other cases the mixture was poured in water (50 mL) and filtered or extracted with EtOAc (3 × 30mL) and evaporated to dryness. In case of diethyl malonate and 2,4,6-trinitrotoluene 0.28 mL (2 mmol) of Et<sub>3</sub>N was added to the reaction mixture. On completion of the reaction the mixture was poured in water (50 mL), acidified with conc. HCl to pH 2, extracted with EtOAc (3 × 30mL) and evaporated to dryness.

Adduct with acetylacetone: **3-(6-Nitro-1-oxido-4,7-dihydro[1,2,5]oxadiazolo[3,4-b]pyridin-7-yl)pentane-2,4-dione monohydrate (6a and 6b)**.

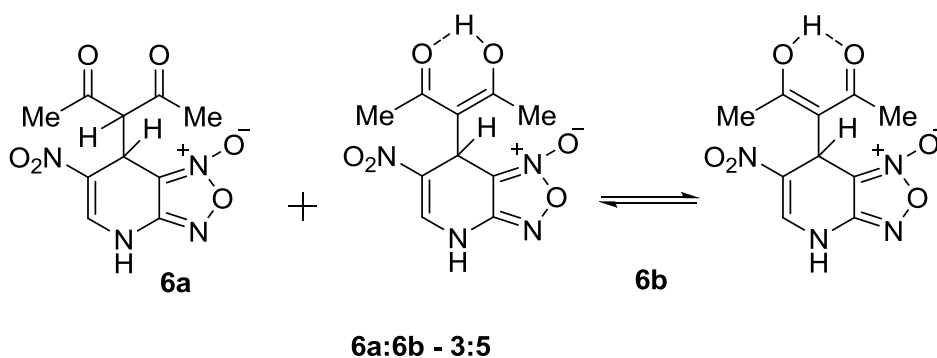

M.p. 153-154°C (dec.); <sup>1</sup>H NMR (DMSO-d<sub>6</sub>, 300.13 MHz, δ) for **6a**: 2.14 (s, 3H, CH<sub>3</sub>), 2.36 (s, 3H, CH<sub>3</sub>), 4.71 (d, J=2.4 Hz, 1H), 5.15 (d, J=2.4 Hz, 1H), 8.41 (s, 1H, H(5)), 11.72 (br.s., 1H, NH); for **6b**: 2.06 (br.s., 3H, CH<sub>3</sub>), 2.40 (br.s., 3H, CH<sub>3</sub>), 5.44 (s, 1H, H(1')), 8.34 (s, 1H, H(5)), 11.72 (br.s., 1H, NH), 14.79 (br.s., 1H, OH); <sup>13</sup>C NMR (DMSO-d<sub>6</sub>, 75.47 MHz, δ) for mixture of **6a** and **6b**: 29.39, 30.78, 31.07, 31.37, 64.35, 107.21, 123.82, 125.83, 137.73, 139.81, 152.03, 202.62, 204.60 ppm; anal. calcd for C<sub>10</sub>H<sub>12</sub>N<sub>4</sub>O<sub>7</sub> (%): C, 40.01; H, 4.03; N, 18.66; found C, 40.02; H, 3.69; N, 18.76.

Adduct with benzoylacetone: **2-(6-Nitro-1-oxido-4,7-dihydro[1,2,5]oxadiazolo[3,4-b]pyridin-7-yl)-1-phenylbutane-1,3-dione (7a and 7b)**.

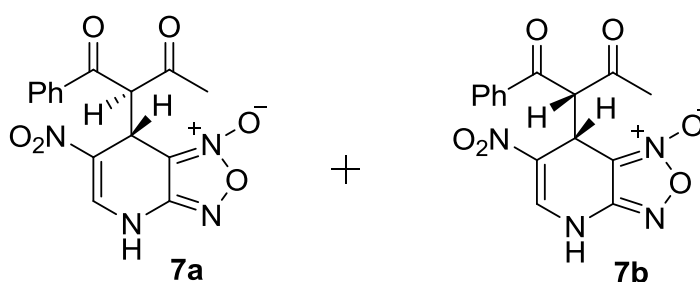

M.p. 190-191°C (dec);  $^1\text{H}$  NMR (DMSO- $d_6$ , 300.13 MHz,  $\delta$ ): major diastereomer: 2.17 (s, 3H,  $\text{CH}_3$ ), 5.03 (d,  $J=2.6$  Hz, 1H), 5.59 (d,  $J=2.6$  Hz, 1H), 7.48-7.76 (m, 3H), 8.13 (d,  $J=7.6$  Hz, 2H, o-Ph), 8.44 (s, 1H) ppm; minor diastereomer: 2.42 (s, 3H,  $\text{CH}_3$ ), 5.34 (d,  $J=2.9$  Hz, 1H), 5.52 (d,  $J=2.9$  Hz, 1H), 7.48-7.76 (m, 3H), 7.90 (d,  $J=7.7$  Hz, 2H, o-Ph), 8.40 (s, 1H) ppm. HRMS (ESI):  $[\text{C}_{15}\text{H}_{12}\text{N}_4\text{O}_6 + \text{Na}]^+$  calc. 367.0649, found 367.0638. anal. calcd for  $\text{C}_{15}\text{H}_{12}\text{N}_4\text{O}_6$  (%): C, 52.33; H, 3.51; N, 16.27; found C, 52.31; H, 3.64; N, 16.24.

Adduct with 1,3-cyclohexanedione: **3-Hydroxy-2-(6-nitro-1-oxido-4,7-dihydro[1,2,5]oxadiazolo[3,4-*b*]pyridin-7-yl)cyclohex-2-en-1-one (8).**

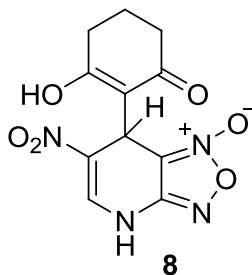

M.p. 180-181°C (dec.);  $^1\text{H}$  NMR (DMSO- $d_6$ , 300.13 MHz,  $\delta$ ): 1.75-1.79 (m, 2H,  $\text{CH}_2$ ), 2.33 (br.s., 4H,  $2\text{CH}_2$ ), 5.54 (s, 1H, CH), 8.26 (s, 1H, CH), 11.46 (br.s., 2H,  $\text{NH}+\text{OH}$ ) ppm;  $^{13}\text{C}$  NMR (DMSO- $d_6$ , 75.47 MHz,  $\delta$ ): 20.40, 26.47, 29.18, 107.85, 108.53, 125.93, 137.33, 151.85, 217.31 ppm; anal. calcd for  $\text{C}_{11}\text{H}_{10}\text{N}_4\text{O}_6$  (%): C, 44.90; H, 3.43; N, 19.04; found C, 45.05; H, 3.40; N, 19.12.

Adduct with dimedone: **5,5-Dimethyl-3-hydroxy-2-(6-nitro-1-oxido-4,7-dihydro[1,2,5]oxadiazolo[3,4-*b*]pyridin-7-yl)cyclohex-2-en-1-one (9).**

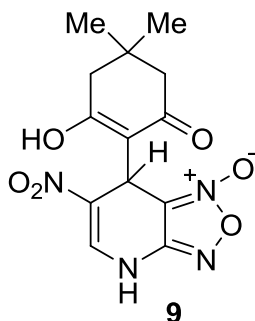

M.p. 212-213°C (dec);  $^1\text{H}$  NMR (DMSO- $d_6$ , 300.13 MHz,  $\delta$ ): 0.95 (s, 6H, 2CH<sub>3</sub>), 2.23 (br.s., 4H, 2CH<sub>2</sub>), 5.52 (s, 1H, CH, H(7)), 8.26 (s, 1H, H(5)), 11.42 (br.s., 2H, NH+OH) ppm;  $^{13}\text{C}$  NMR (DMSO- $d_6$ , 75.47 MHz,  $\delta$ ): 27.52, 28.89, 31.58, 107.93, 125.86, 137.31, 151.78, 200.29, 200.95 ppm; HRMS (ESI): [C<sub>13</sub>H<sub>14</sub>N<sub>4</sub>O<sub>6</sub> + H]<sup>+</sup> calc. 323.0986, found 323.0988. anal. calcd for C<sub>13</sub>H<sub>14</sub>N<sub>4</sub>O<sub>6</sub> (%): C, 48.45; H, 4.38; N, 17.38; found C, 48.52; H, 4.33; N, 17.53.

Adduct with Meldrum's acid: **2,2-Dimethyl-5-(6-nitro-1-oxido-4,7-dihydro[1,2,5]oxadiazolo[3,4-*b*]pyridin-7-yl)-1,3-dioxane-4,6-dione (10).**

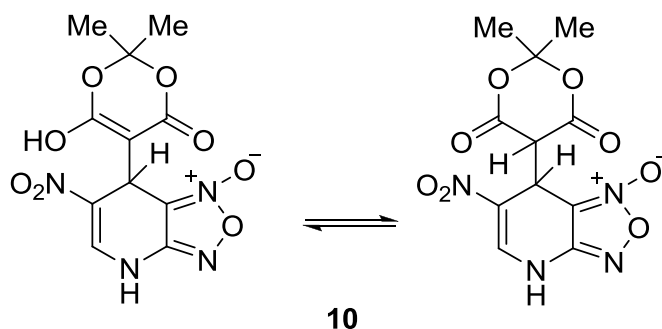

M.p. 135-136°C (dec.);  $^1\text{H}$  NMR (acetone- $d_6$ , 300.13 MHz,  $\delta$ ): 1.75 (s, 3H, CH<sub>3</sub>), 1.90 (s, 3H, CH<sub>3</sub>), 4.85 (s, 1H, H(1')), 5.64 (s, 1H, H(7)), 8.51 (s, 1H, H(5)), 10.54 (br.s., 1H, NH) ppm. HRMS (ESI): [C<sub>11</sub>H<sub>10</sub>N<sub>4</sub>O<sub>8</sub> + H]<sup>+</sup> calc. 327.0571, found 327.0565. anal. calcd for C<sub>11</sub>H<sub>10</sub>N<sub>4</sub>O<sub>8</sub> (%): C, 40.50; H, 3.09; N, 17.17; found C, 40.32; H, 2.86; N, 17.34.

Adduct with *N,N*-dimethylbarbituric acid: **1,3-Dimethyl-5-(6-nitro-1-oxido-4,7-dihydro[1,2,5]oxadiazolo[3,4-*b*]pyridin-7-yl)pyrimidine-2,4,6(1*H*,3*H*,5*H*)-trione (11).**

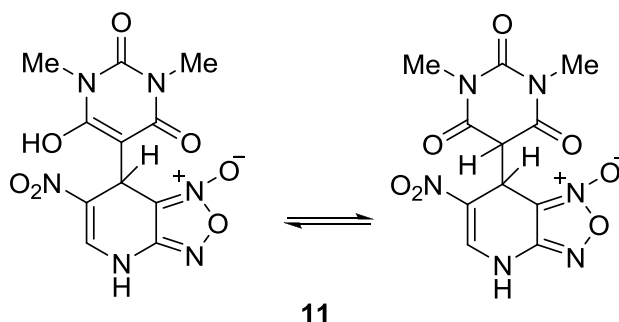

M.p. 186-187°C (dec.);  $^1\text{H}$  NMR (acetone- $d_6$ , 300.13 MHz,  $\delta$ ): 3.22 (s, 3H,  $\text{CH}_3$ ), 3.27 (s, 3H,  $\text{CH}_3$ ), 4.51 (s, 1H, H(1')), 5.46 (d, 1H,  $J=3.0$  Hz, H(7)), 8.53 (s, 1H, H(5)), 10.58 (br.s., 1H, NH) ppm; HRMS (ESI):  $[\text{C}_{11}\text{H}_{10}\text{N}_6\text{O}_7 + \text{H}]^+$  calc. 339.0684, found 339.0679. anal. calcd for  $\text{C}_{11}\text{H}_{10}\text{N}_6\text{O}_7$  (%): C, 39.06; H, 2.98; N, 24.85; found C, 38.94; H, 3.01; N, 24.85.

Adduct with ethyl acetoacetate: **Ethyl 2-(6-nitro-1-oxido-4,7-dihydro[1,2,5]oxadiazolo[3,4-*b*]pyridin-7-yl)-3-oxobutanoate (12).**

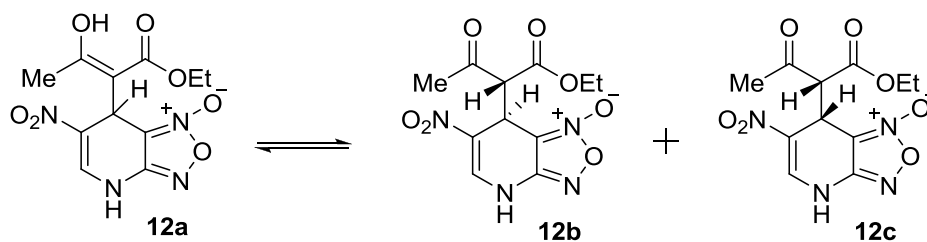

M.p. 143-144°C (dec.);  $^1\text{H}$  NMR (DMSO- $d_6$ , 300.13 MHz,  $\delta$ ): for **12a**: 1.06-1.23 (m, 3H,  $\text{CH}_3$ ), 3.99-4.20 (m, 2H,  $\text{CH}_2$ ), 5.37 (s, 1H, H(7)), 8.37 (s, 1H, H(5)), 11.73 (br.s., 1H, NH), 13.01 (s, 1H, OH) ppm; for **12b+12c**: 1.06-1.23 (m, 3H,  $\text{CH}_3$ ), 3.99-4.20 (m, 2H,  $\text{CH}_2$ ), 4.24 and 4.42 (both d, 1H,  $J=2.5$  Hz, H(1')), 4.98 and 5.2 (both d, 1H,  $J=2.5$  Hz, H(7)), 8.2 and 8.46 (both s, 1H, H(5)), 10.90 and 11.73 (both br.s., 1H, NH) ppm; anal. calcd for  $\text{C}_{11}\text{H}_{12}\text{N}_4\text{O}_7$  (%): C, 42.31; H, 3.87; N, 17.94; found C, 42.45; H, 4.69; N, 17.73.

Adduct with diethylmalonate: **Diethyl (6-nitro-1-oxido-4,7-dihydro[1,2,5]oxadiazolo[3,4-*b*]pyridin-7-yl)malonate (13).**

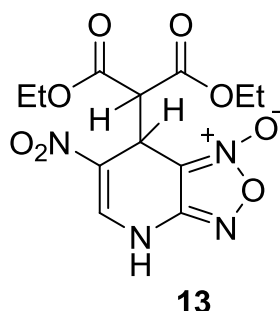

Brown oil.  $^1\text{H}$  NMR (DMSO- $d_6$ , 300.13 MHz,  $\delta$ ): 1.10-1.22 (m, 6H, 2CH<sub>3</sub>), 3.99-4.17 (m, 5H, 2CH<sub>2</sub> + CH), 5.05 (d, 1H,  $J = 3.0$  Hz, H(7)), 8.46 (s, 1H, H(5)), 12.03 (br.s, 1H, NH) ppm.  $^{13}\text{C}$  NMR (DMSO- $d_6$ , 75.47 MHz,  $\delta$ ): 14.08 and 14.36 (2 CH<sub>3</sub>), 33.08, 51.05, 62.00 and 62.43 (2 CH<sub>2</sub>), 106.75, 123.45, 140.77, 152.33, 166.24 and 166.97 (2 C=O) ppm; anal. calcd for C<sub>12</sub>H<sub>14</sub>N<sub>4</sub>O<sub>8</sub> (%): C, 42.11; H, 4.12; N, 16.37; found C, 42.35; H, 4.39; N, 16.22.

Adduct with 1,1,1-trifluoroacetylacetone: **(3Z)-5,5,5-trifluoro-4-hydroxy-3-(6-nitro-1-oxido-4,7-dihydro[1,2,5]oxadiazolo[3,4-*b*]pyridin-7-yl)pent-3-en-2-one (14).**

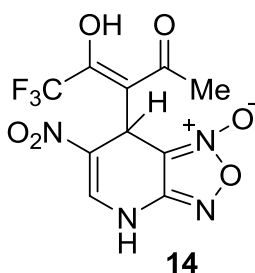

Not isolated.  $^1\text{H}$  NMR (DMSO- $d_6$ , 300.13 MHz,  $\delta$ ): 2.34 (br.s., 3H, CH<sub>3</sub>), 5.38 (s, 1H, H(7)), 8.35 (s, 1H, H(5)), 11.70 (br.s, 1H, NH) ppm.

Adduct with 2,4,6-trinitrotoluene: **6-Nitro-7-(2,4,6-trinitrobenzyl)-4,7-dihydro[1,2,5]oxadiazolo[3,4-*b*]pyridine 1-oxide (15).**

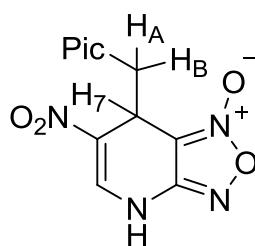

**15**

M.p. 122-123°C (dec.);  $^1\text{H}$  NMR (DMSO- $d_6$ , 300.13 MHz,  $\delta$ ): 3.30-3.38 (dd,  $J=14.1$  Hz,  $J=8.2$  Hz, 1H,  $\text{CH}_2$ ), 3.74 (dd,  $J=14.1$  Hz,  $J=7.2$  Hz, 1H,  $\text{CH}_2$ ), 4.97 (t,  $J=7.6$  Hz, 1H, H(7)), 8.47 (s, 1H, H(5)), 9.10 (s, 2H, Pic), 11.85 (br.s., 1H, NH) ppm;  $^{13}\text{C}$  NMR (DMSO- $d_6$ , 75.47 MHz,  $\delta$ ): 30.33, 31.96, 107.05, 122.80, 125.55, 130.85, 138.79, 146.73, 151.19, 151.22 ppm; IR (KBr,  $\nu_{\text{max}}/\text{cm}^{-1}$ ): 722, 818, 986, 1022, 1084, 1205, 1251, 1321, 1349, 1491, 1544, 1587, 1653, 3093; HRMS (ESI):  $[\text{C}_{12}\text{H}_7\text{N}_7\text{O}_{10} + \text{NH}_4]^+$  calc. 427.0593, found 427.0575. anal. calcd for  $\text{C}_{12}\text{H}_7\text{N}_7\text{O}_{10}$  (%): C, 35.22; H, 1.72; N, 23.96; found C, 35.37; H, 1.58; N, 23.74.



# NMR and HRMS spectra of compounds 6–15

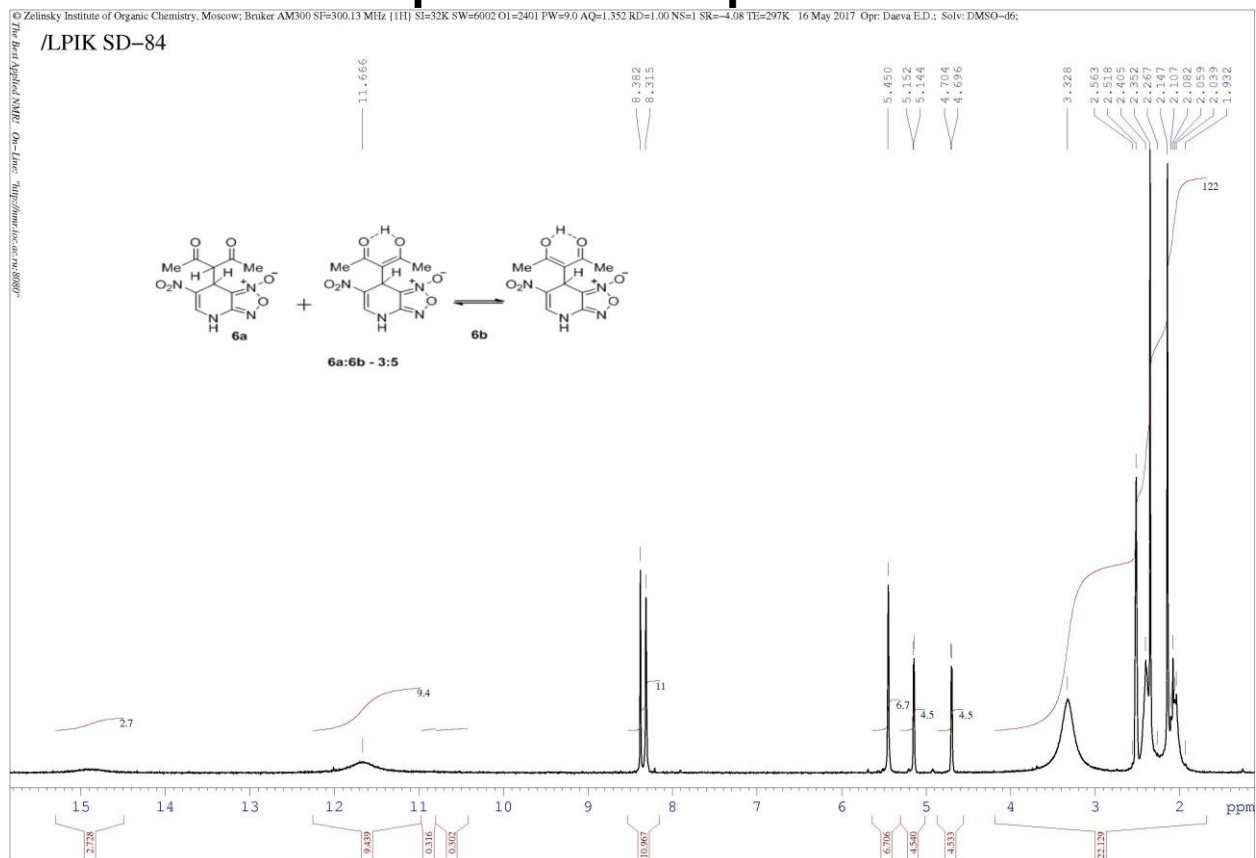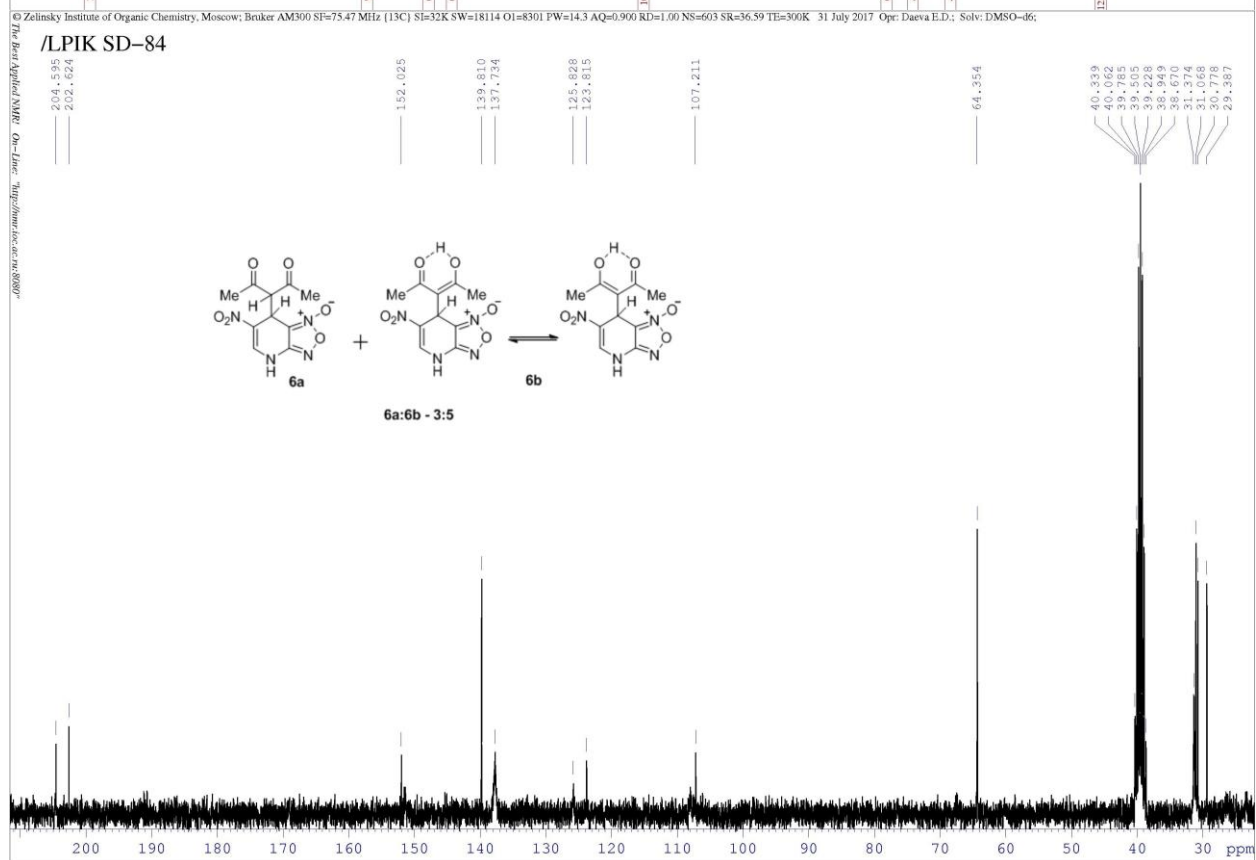

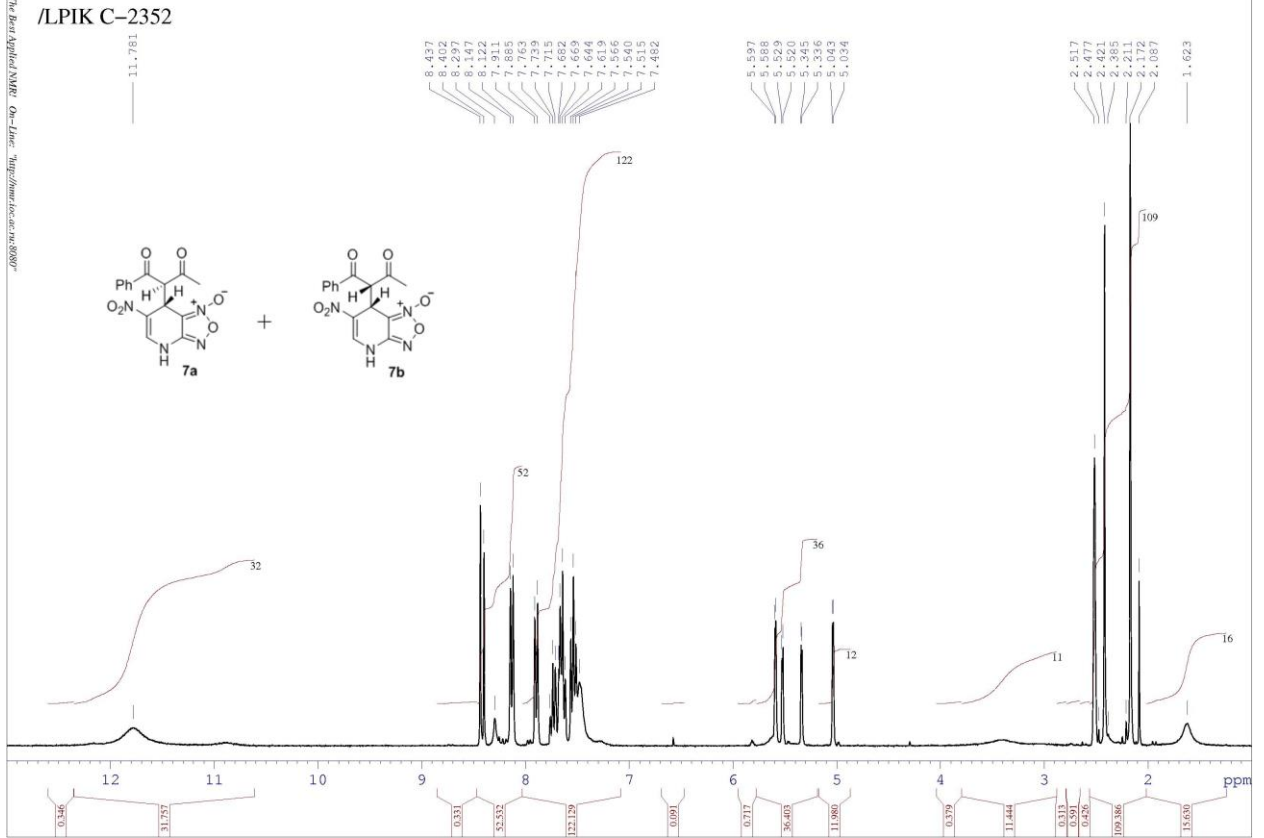

# Display Report

## Analysis Info

Analysis Name D:\Data\Kolotyrkina\2017\Starosotnikov\0926012.d  
Method tune\_low.m  
Sample Name /LPIK C-2352  
Comment C15H12N4O6 mH 345.0829 calibrant added

Acquisition Date 26.09.2017 12:49:10

Operator BDAL@DE  
Instrument / Ser# micrOTOF 10248

## Acquisition Parameter

|             |            |                      |          |                  |           |
|-------------|------------|----------------------|----------|------------------|-----------|
| Source Type | ESI        | Ion Polarity         | Positive | Set Nebulizer    | 0.4 Bar   |
| Focus       | Not active |                      |          | Set Dry Heater   | 180 °C    |
| Scan Begin  | 50 m/z     | Set Capillary        | 4500 V   | Set Dry Gas      | 4.0 l/min |
| Scan End    | 3000 m/z   | Set End Plate Offset | -500 V   | Set Divert Valve | Waste     |

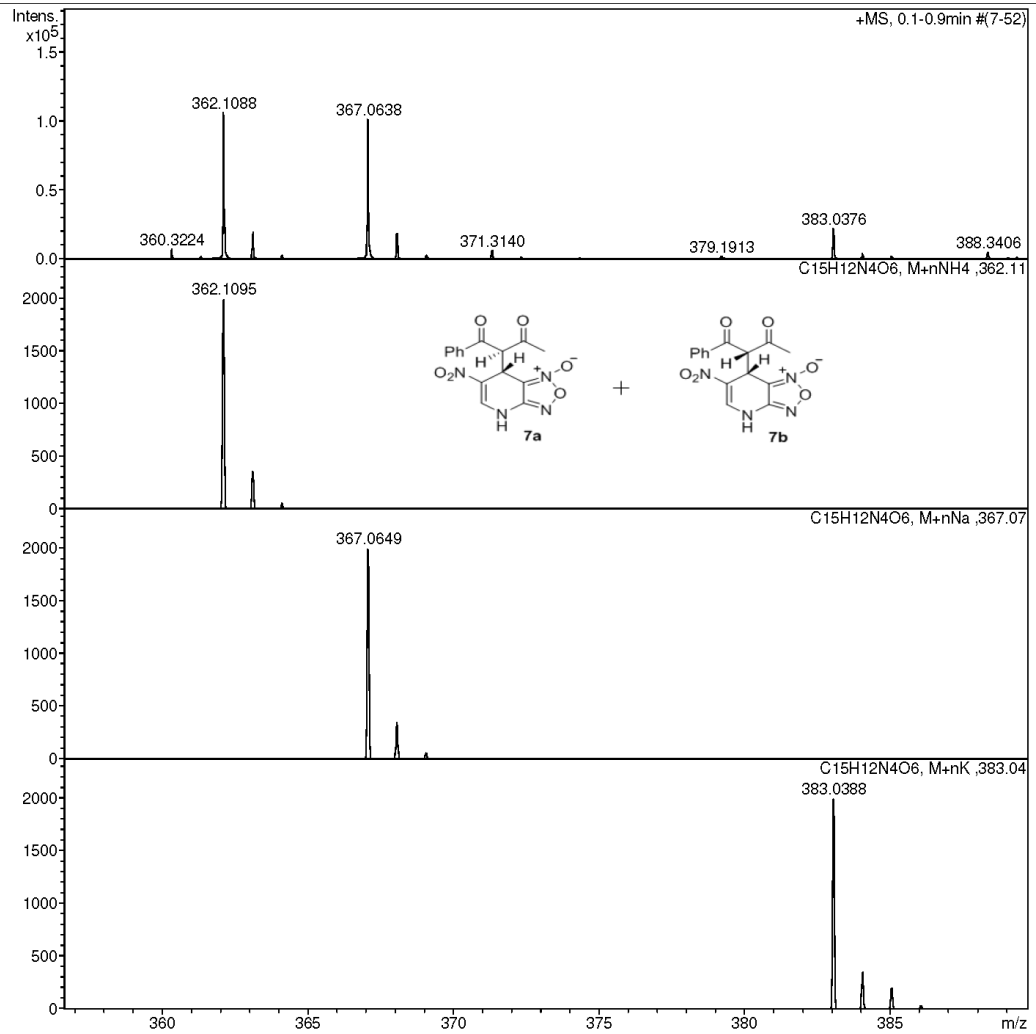

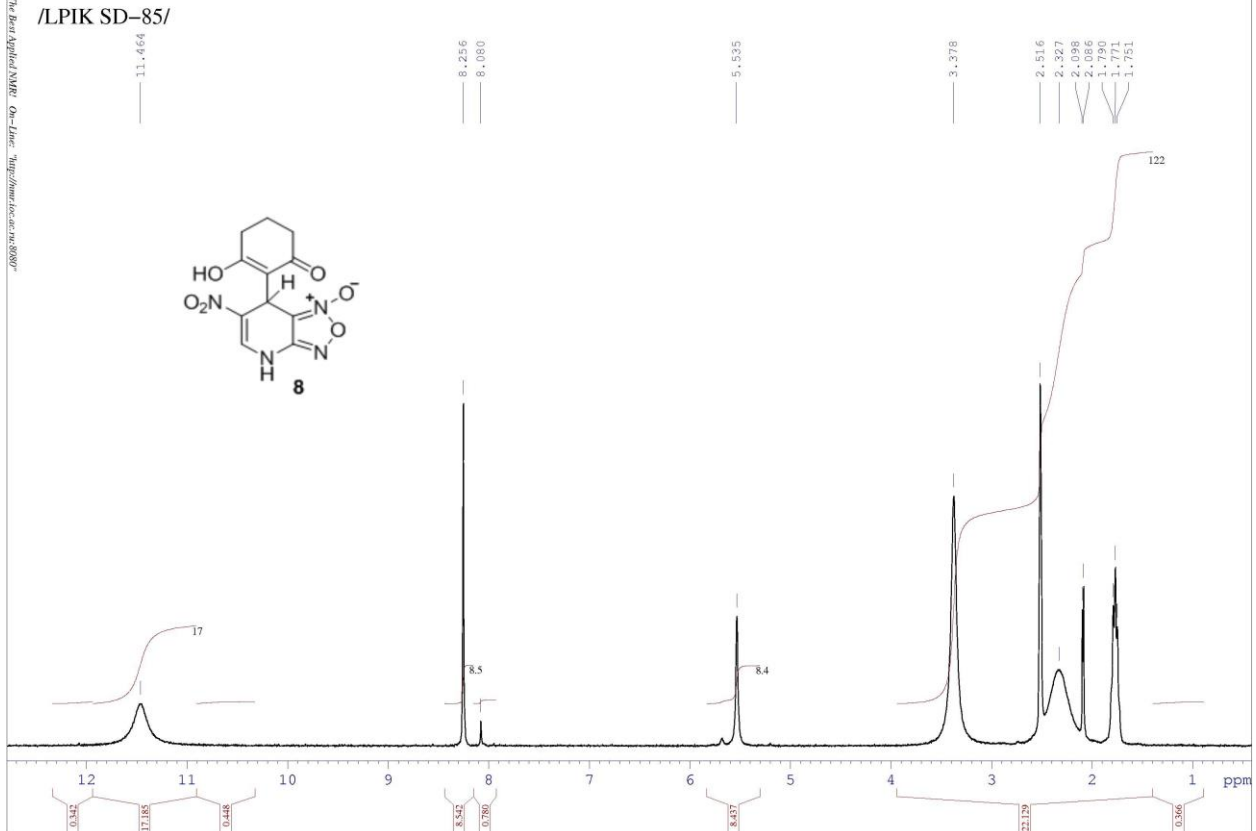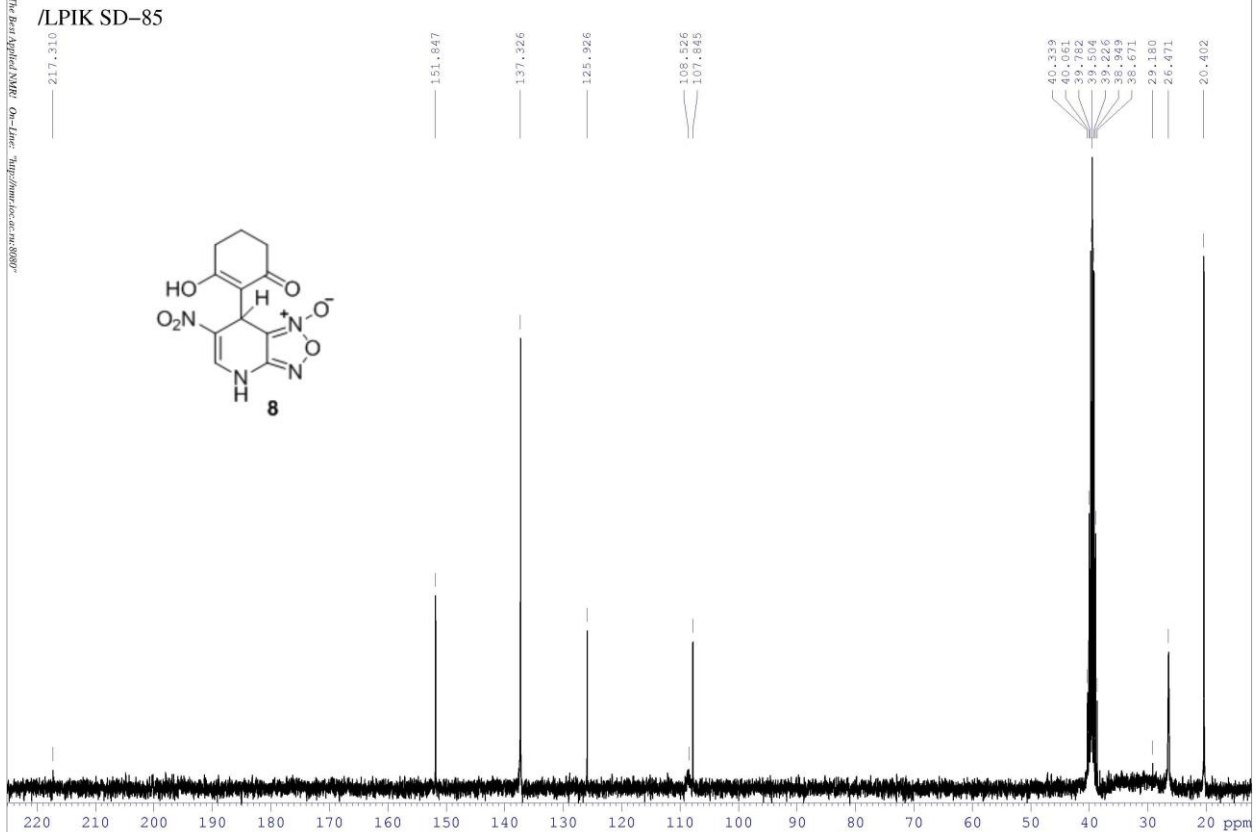

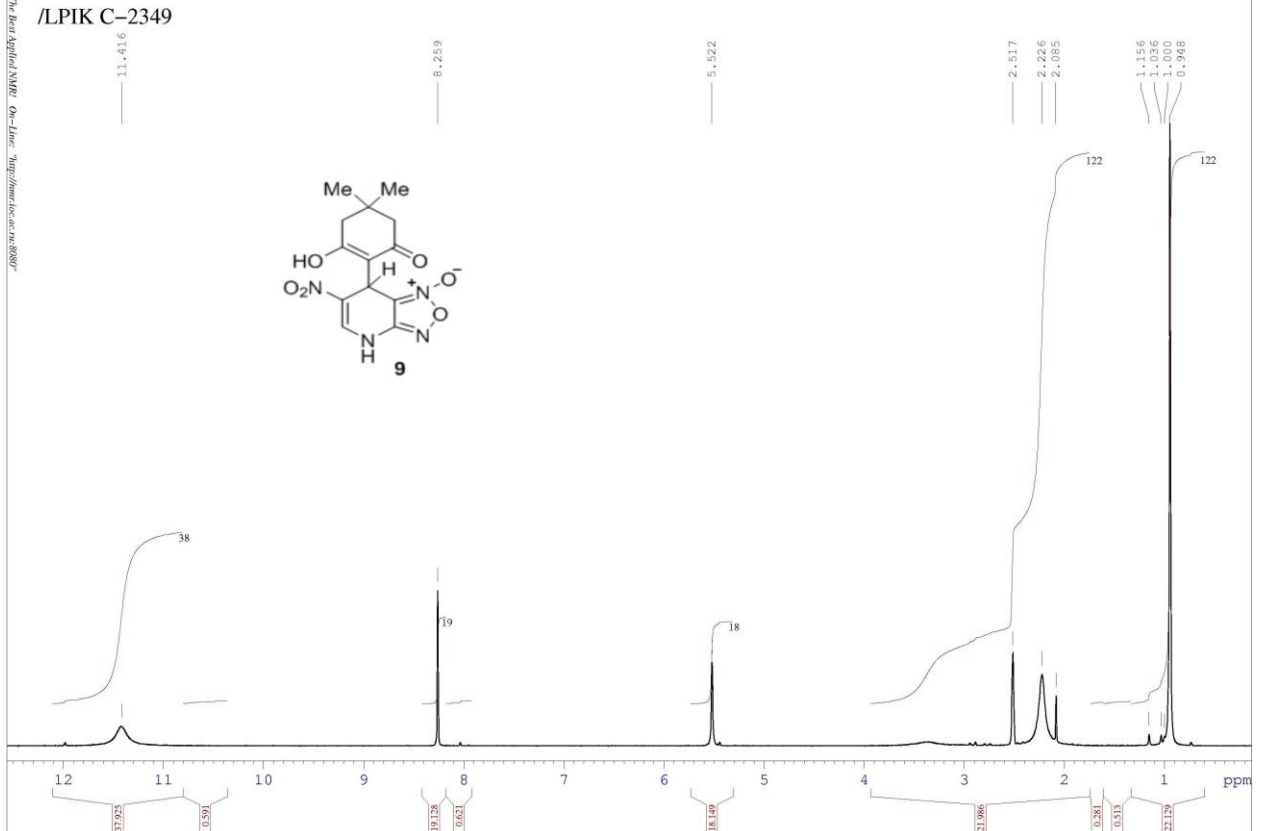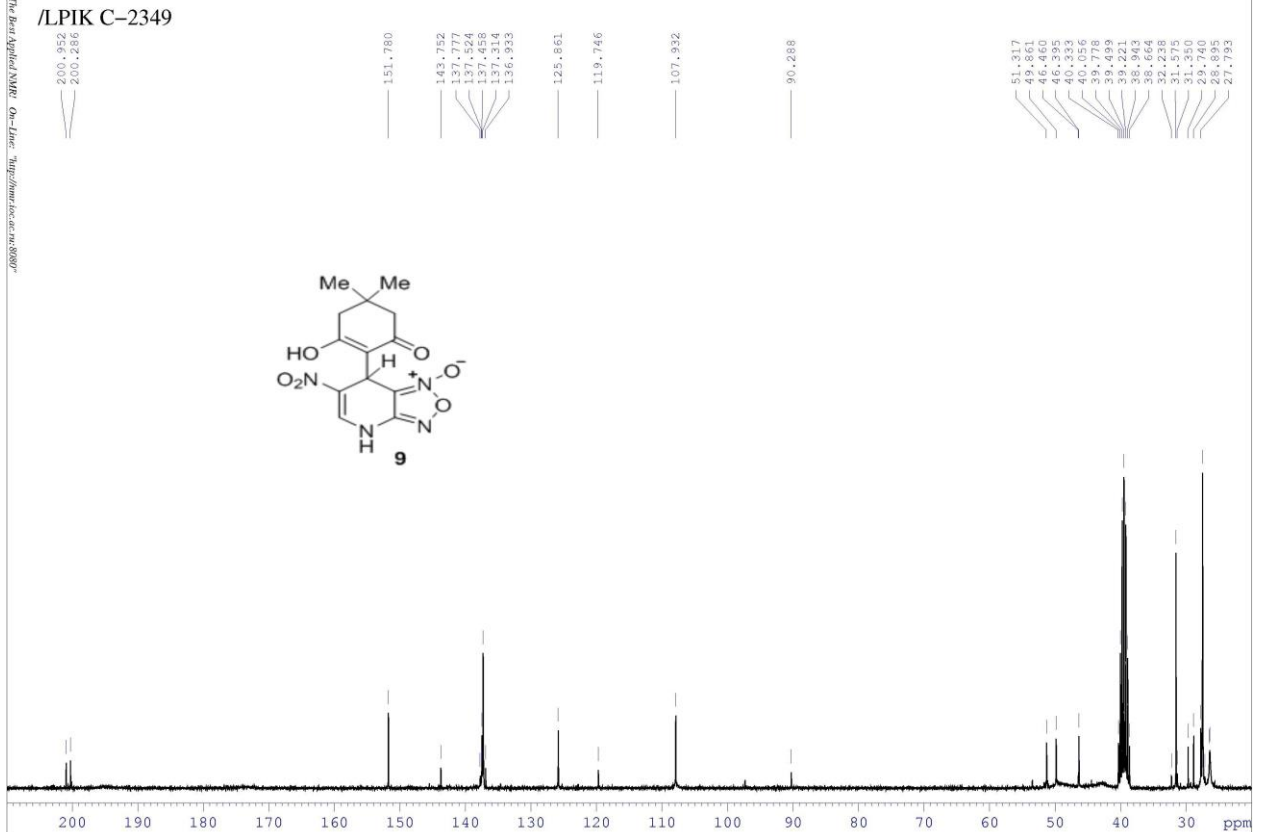

# Display Report

## Analysis Info

Analysis Name D:\Data\Kolotyrkina\2017\Starosotnikov\0926011.d  
Method tune\_low.m  
Sample Name /LPIK C-2349  
Comment C13H14N4O6 mH 323.0986 calibrant added

Acquisition Date 26.09.2017 12:42:22

Operator BDAL@DE  
Instrument / Ser# micrOTOF 10248

## Acquisition Parameter

|             |            |                      |          |                  |           |
|-------------|------------|----------------------|----------|------------------|-----------|
| Source Type | ESI        | Ion Polarity         | Positive | Set Nebulizer    | 0.4 Bar   |
| Focus       | Not active |                      |          | Set Dry Heater   | 180 °C    |
| Scan Begin  | 50 m/z     | Set Capillary        | 4500 V   | Set Dry Gas      | 4.0 l/min |
| Scan End    | 3000 m/z   | Set End Plate Offset | -500 V   | Set Divert Valve | Waste     |

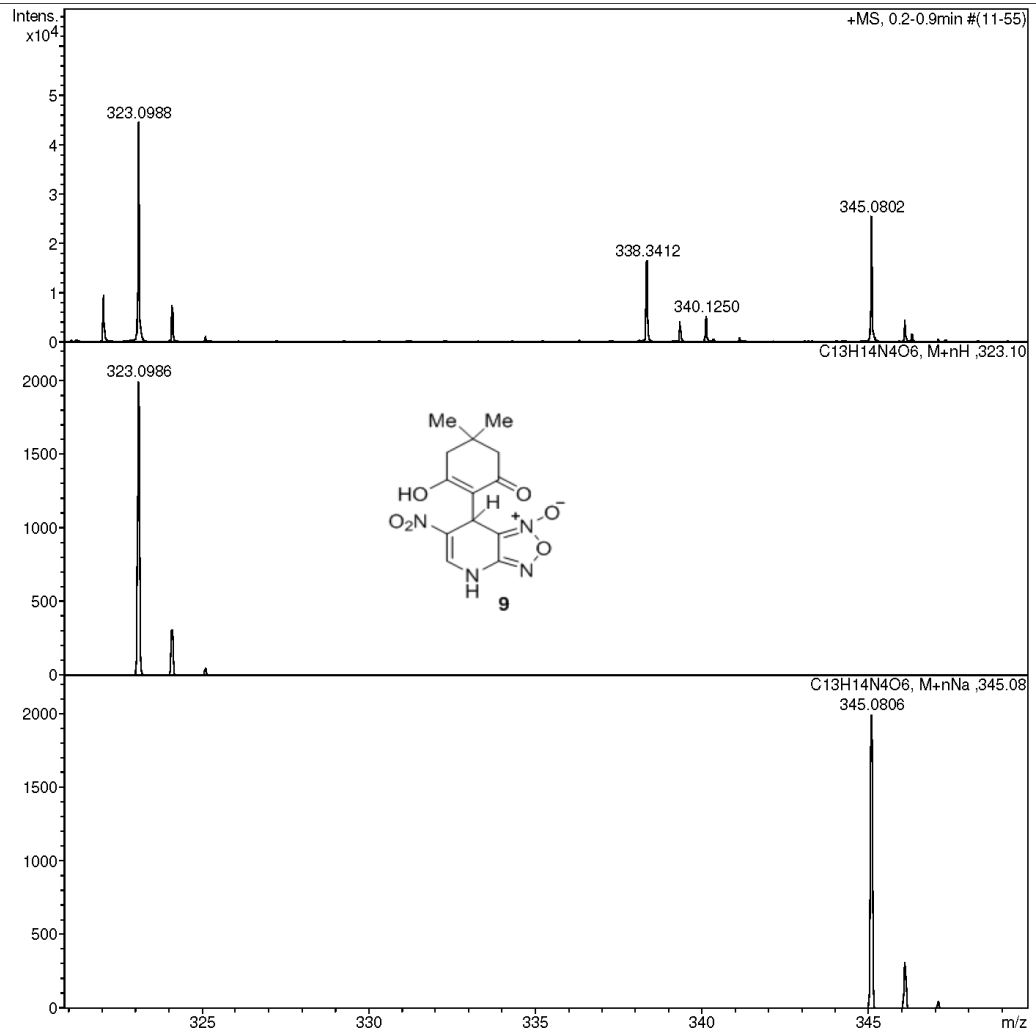

/LPIK C-23541

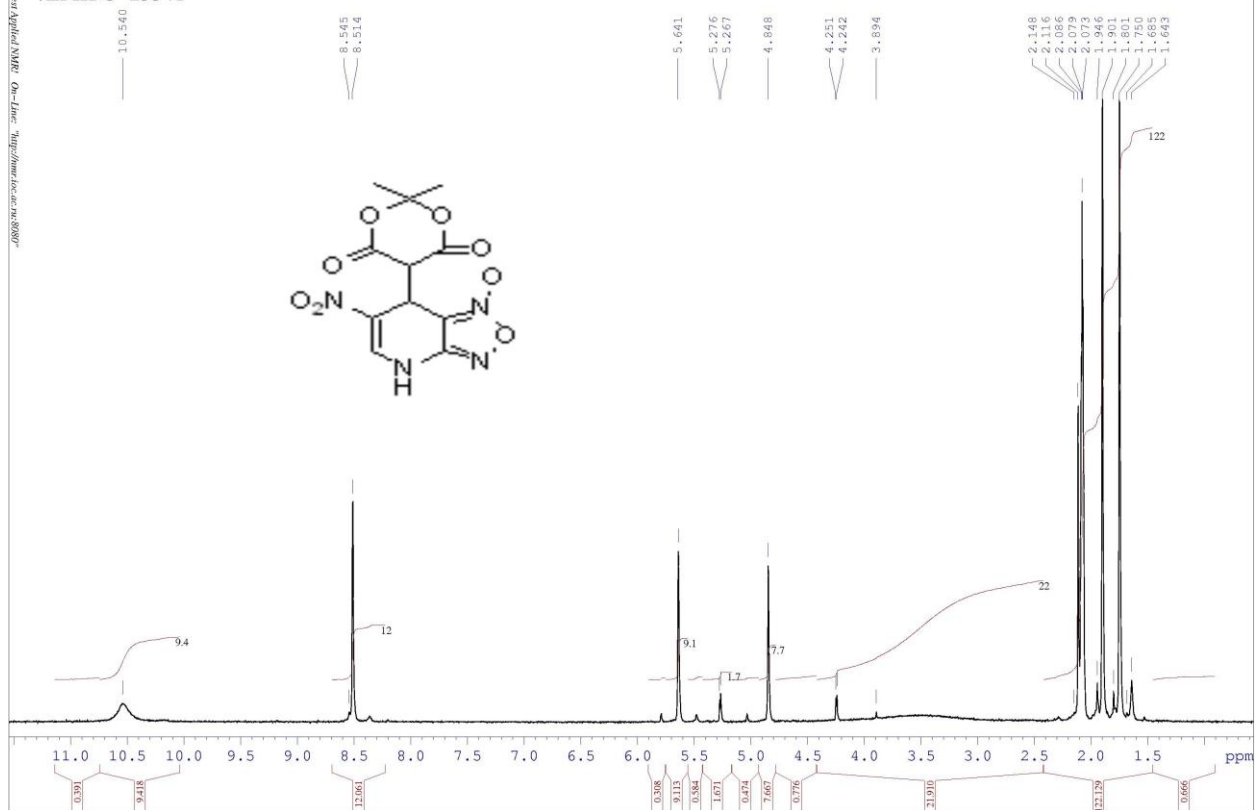

# Display Report

## Analysis Info

Analysis Name D:\Data\Kolotyrkina\2017\Starosotnikov\0926013.d  
Method tune\_low.m  
Sample Name /LPIK C-2354  
Comment C11H10N4O8 mH 327.0571 calibrant added

Acquisition Date 26.09.2017 12:55:18

Operator BDAL@DE  
Instrument / Ser# micrOTOF 10248

## Acquisition Parameter

|             |            |                      |          |                  |           |
|-------------|------------|----------------------|----------|------------------|-----------|
| Source Type | ESI        | Ion Polarity         | Positive | Set Nebulizer    | 0.4 Bar   |
| Focus       | Not active |                      |          | Set Dry Heater   | 180 °C    |
| Scan Begin  | 50 m/z     | Set Capillary        | 4500 V   | Set Dry Gas      | 4.0 l/min |
| Scan End    | 3000 m/z   | Set End Plate Offset | -500 V   | Set Divert Valve | Waste     |

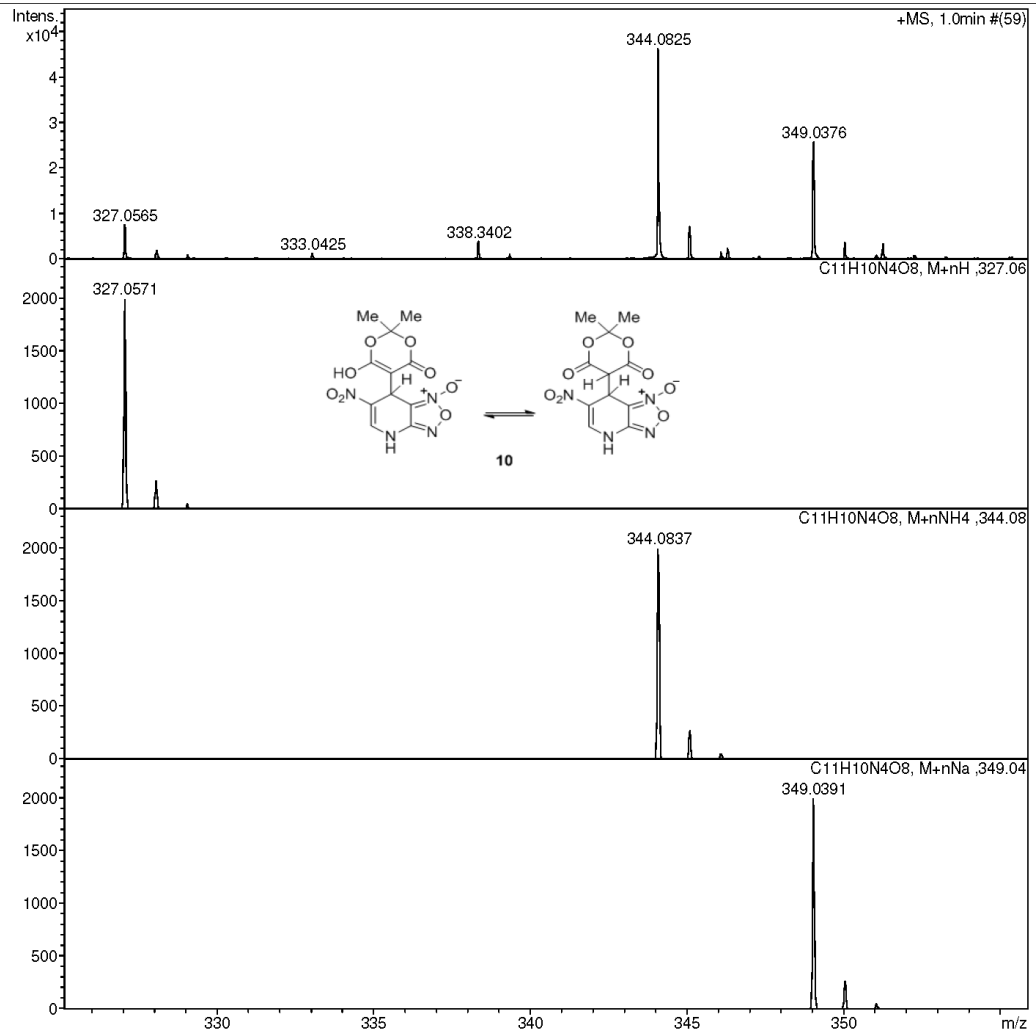



/LPIK C-23551

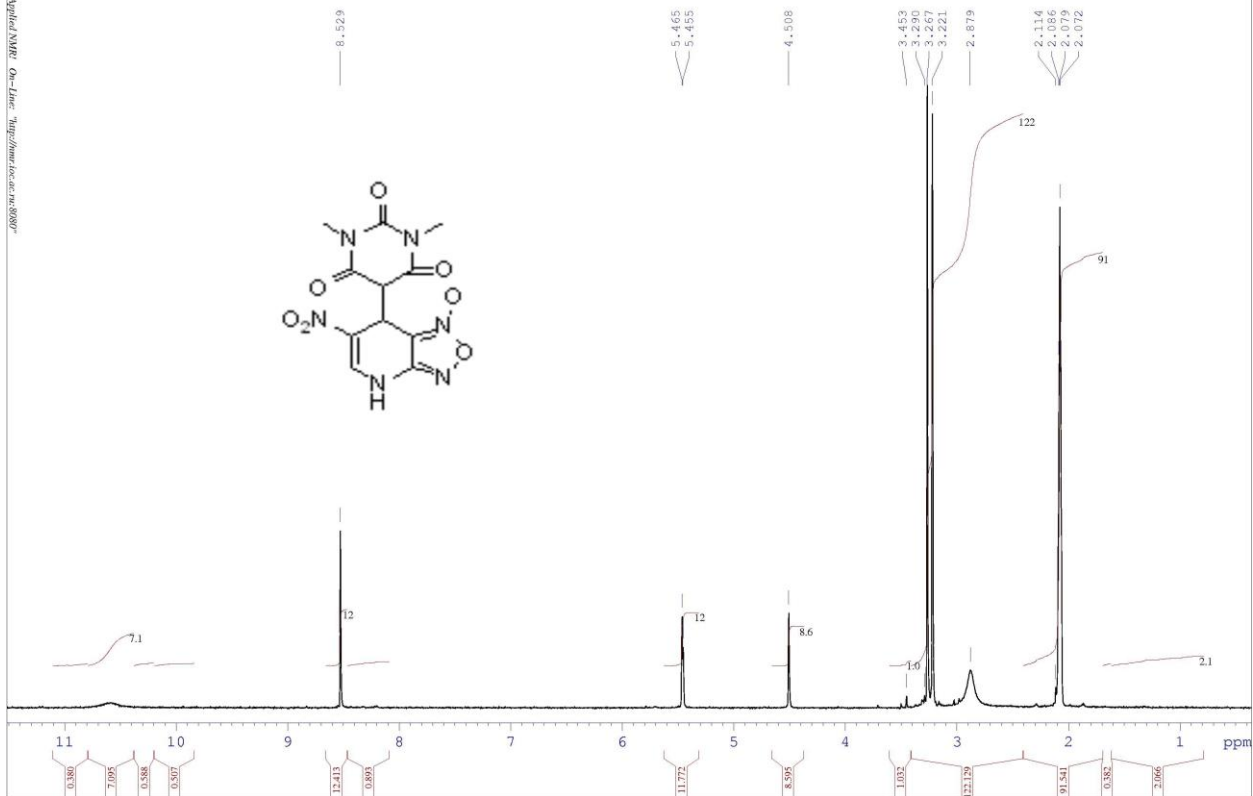

# Display Report

## Analysis Info

Analysis Name D:\Data\Kolotyrkina\2017\Starosotnikov\0926014.d  
Method tune\_low.m  
Sample Name /LPIK C-2355  
Comment C11H10N6O7 mH 339.0683 calibrant added

Acquisition Date 26.09.2017 13:06:38

Operator BDAL@DE  
Instrument / Ser# micrOTOF 10248

## Acquisition Parameter

|             |            |                      |          |                  |           |
|-------------|------------|----------------------|----------|------------------|-----------|
| Source Type | ESI        | Ion Polarity         | Positive | Set Nebulizer    | 0.4 Bar   |
| Focus       | Not active |                      |          | Set Dry Heater   | 180 °C    |
| Scan Begin  | 50 m/z     | Set Capillary        | 4500 V   | Set Dry Gas      | 4.0 l/min |
| Scan End    | 3000 m/z   | Set End Plate Offset | -500 V   | Set Divert Valve | Waste     |

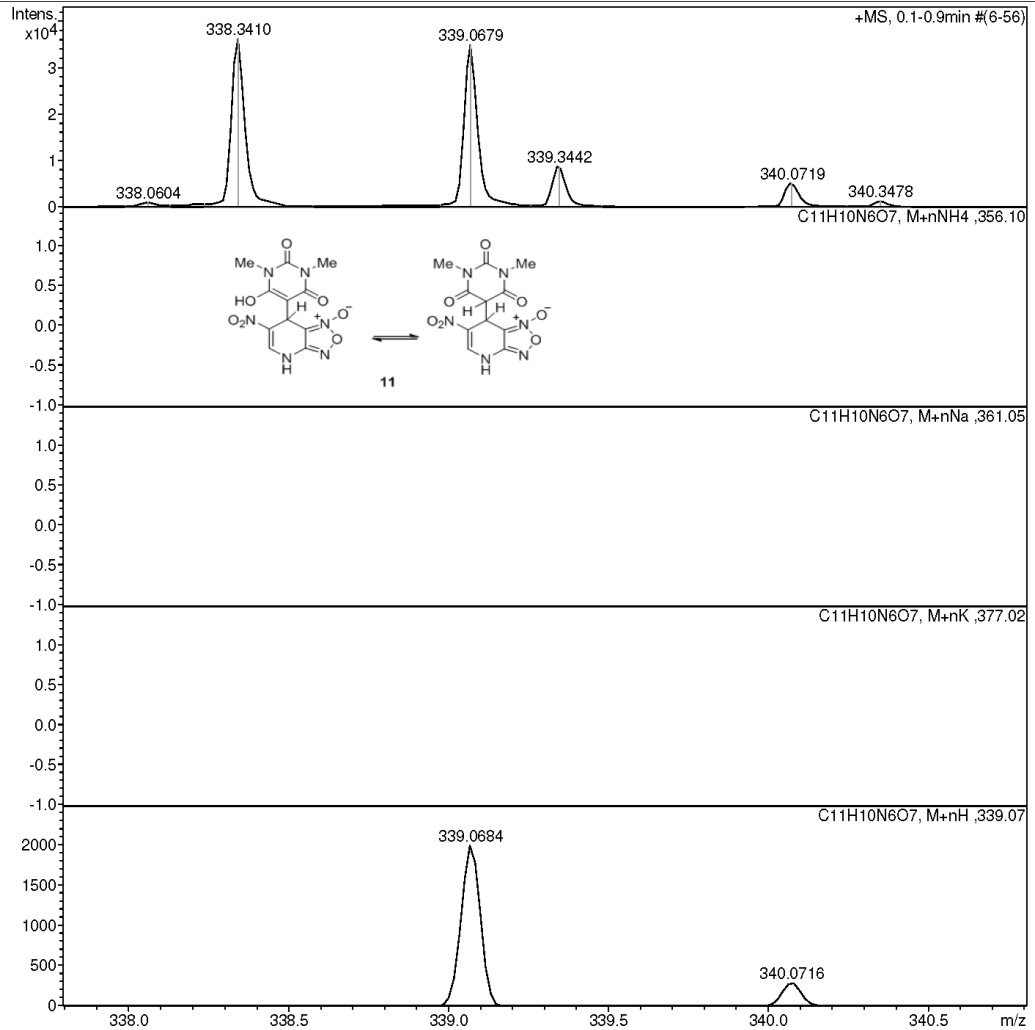

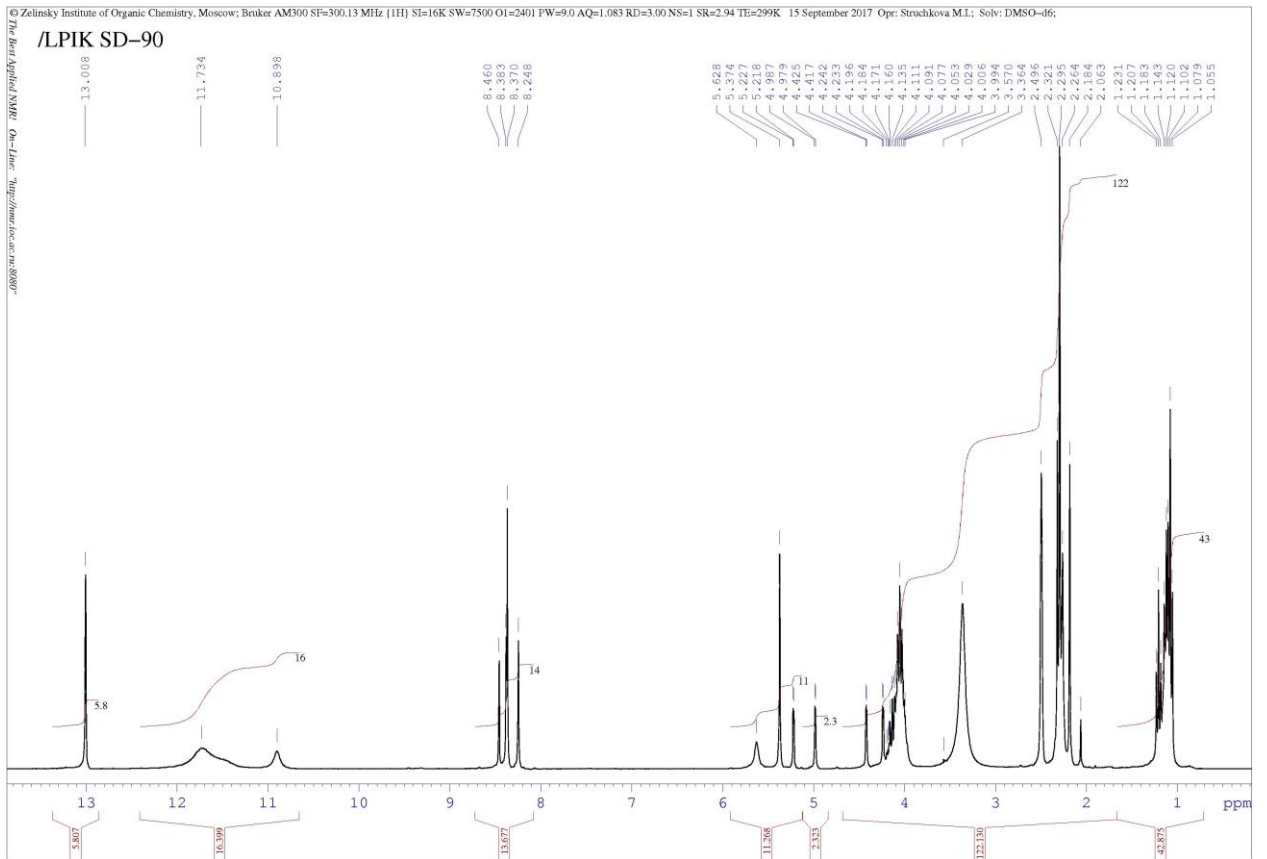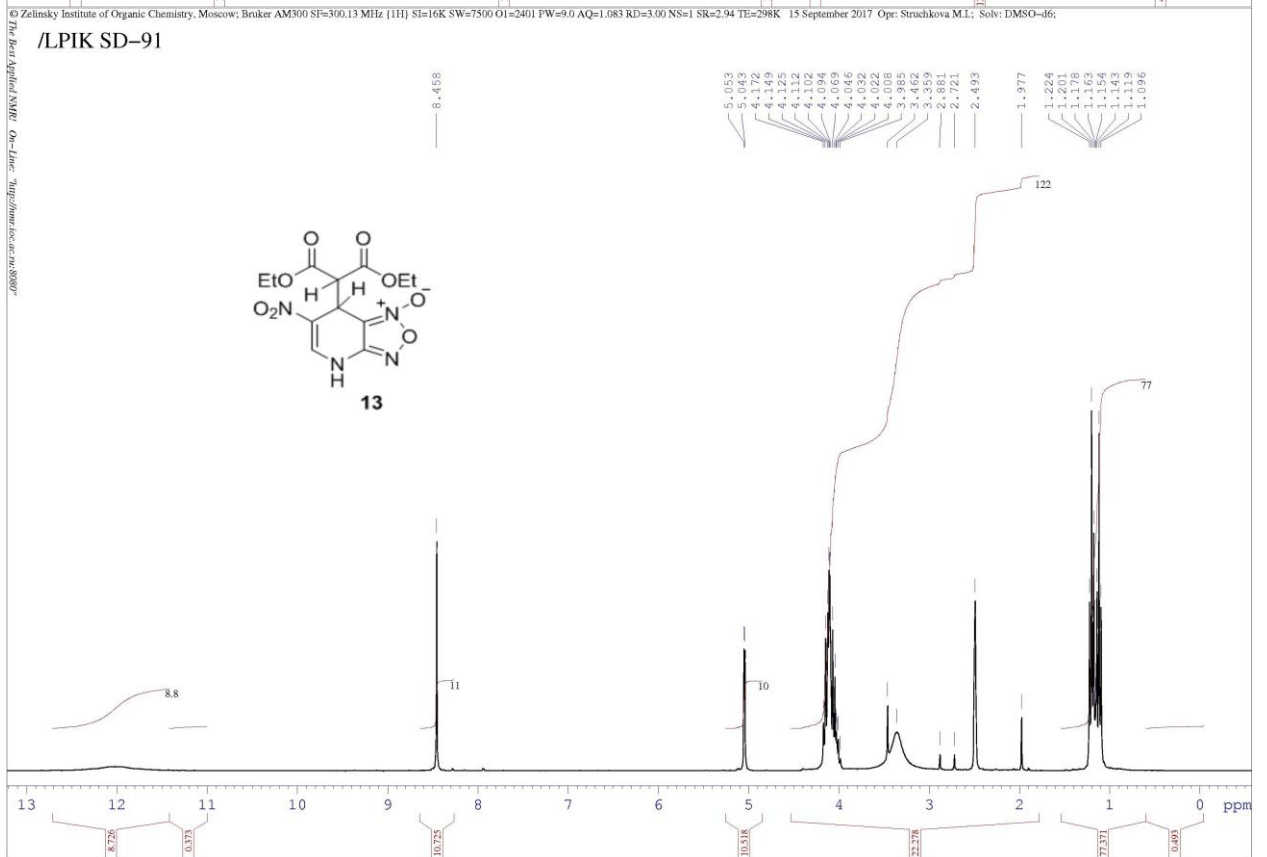

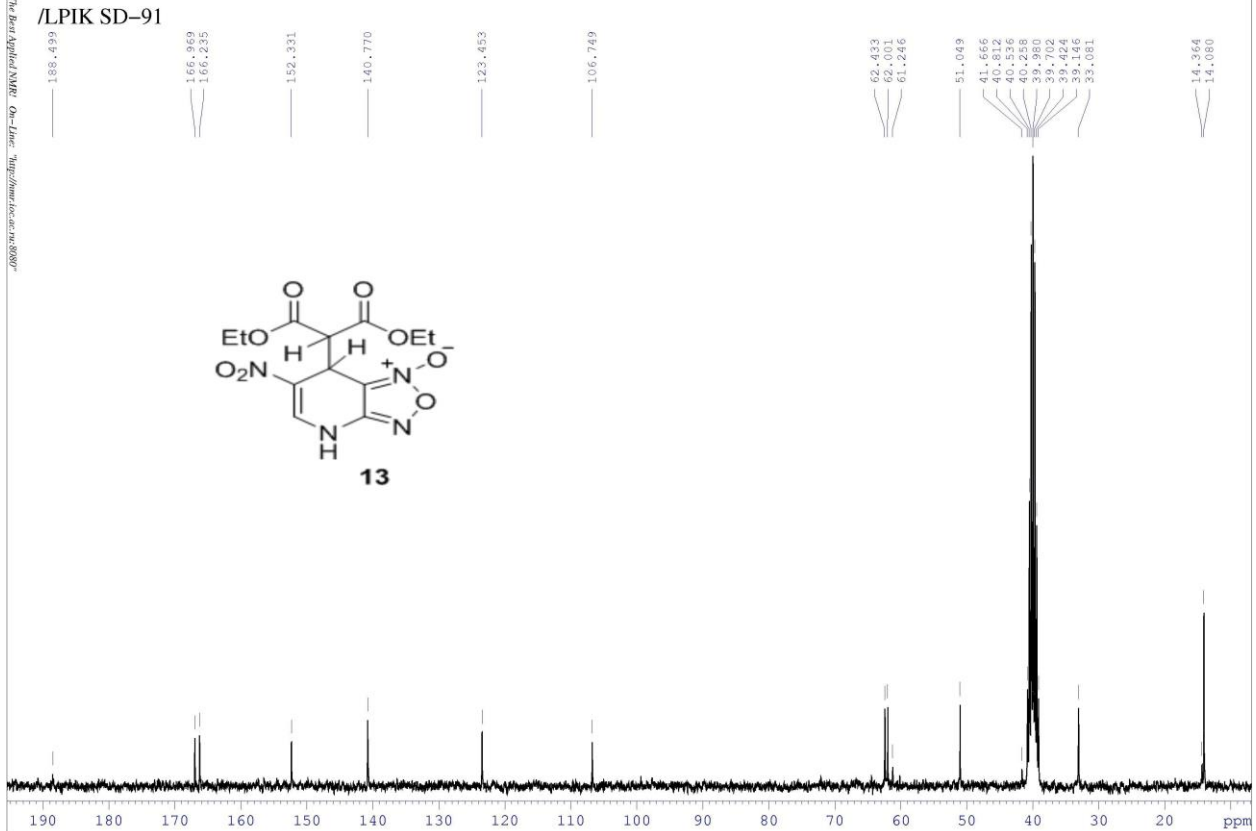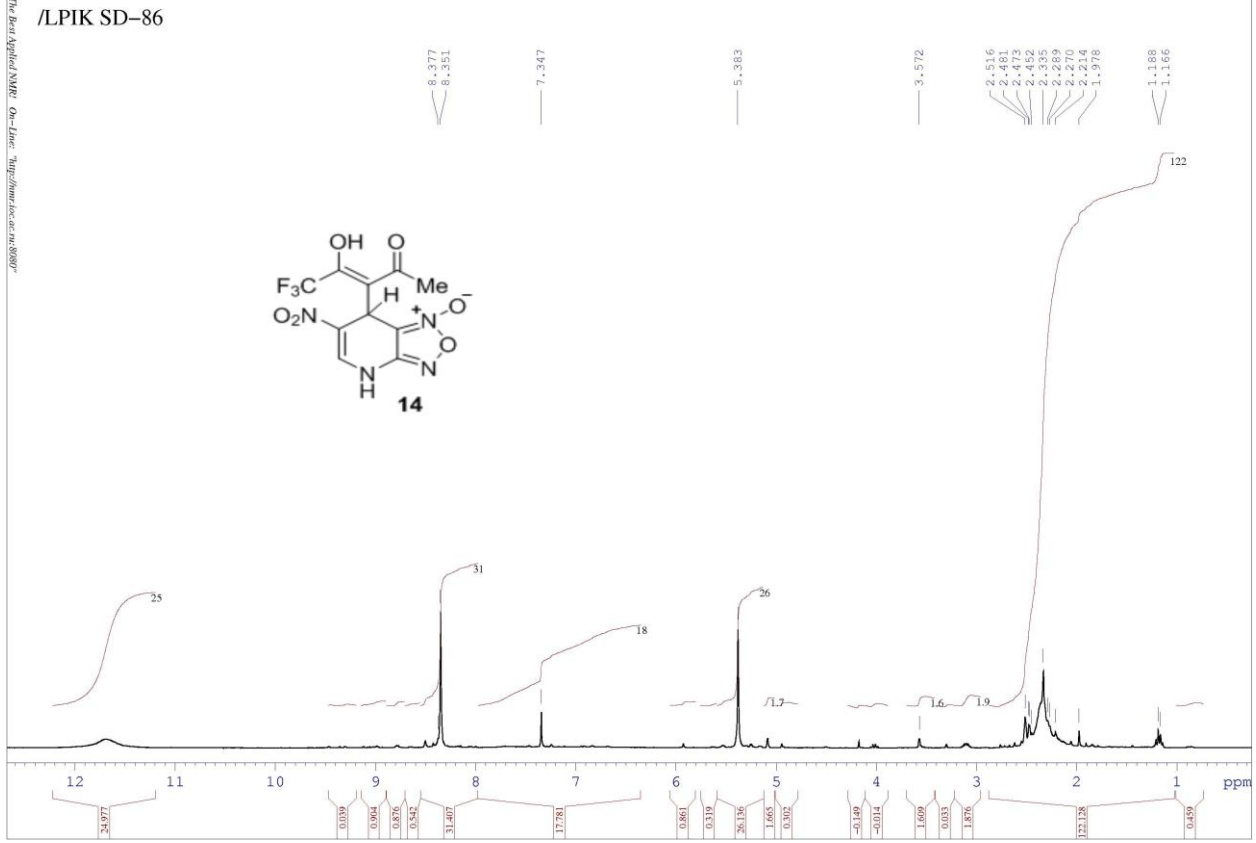

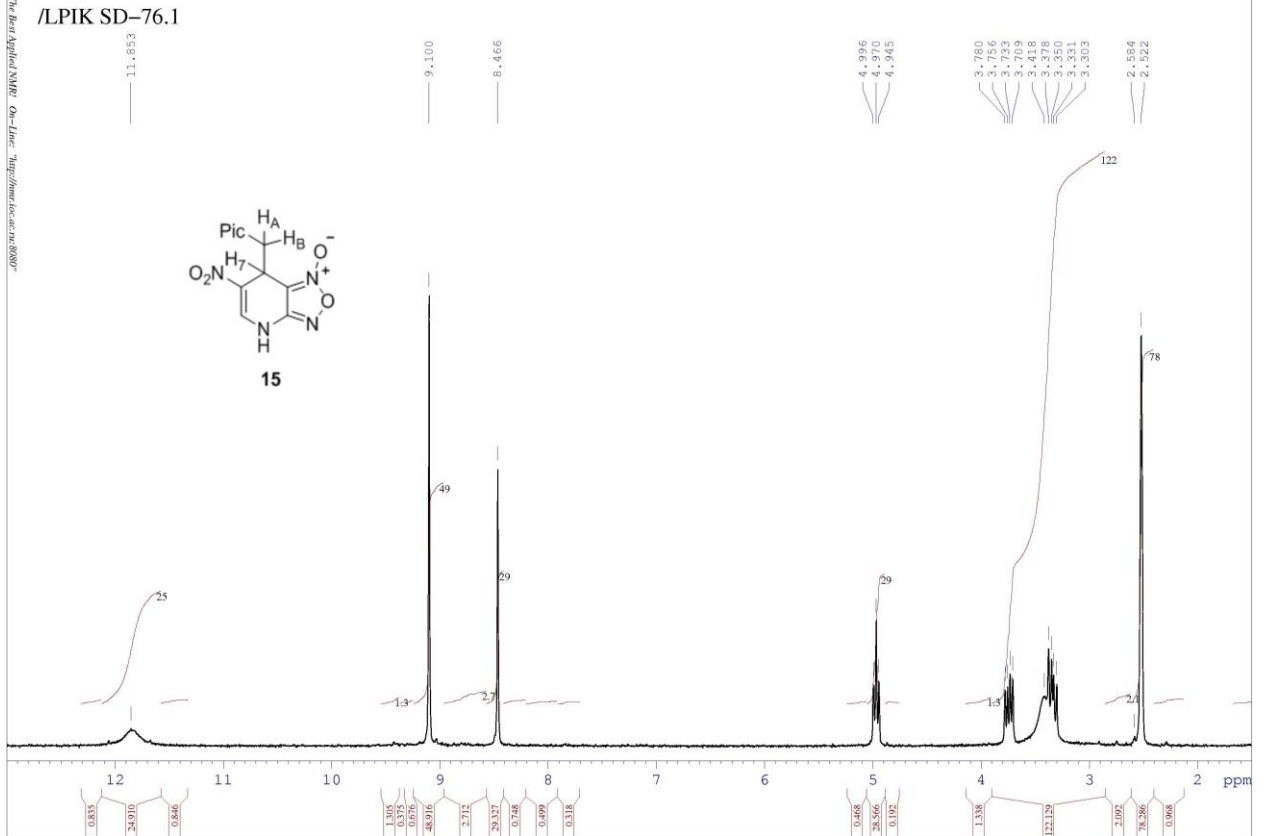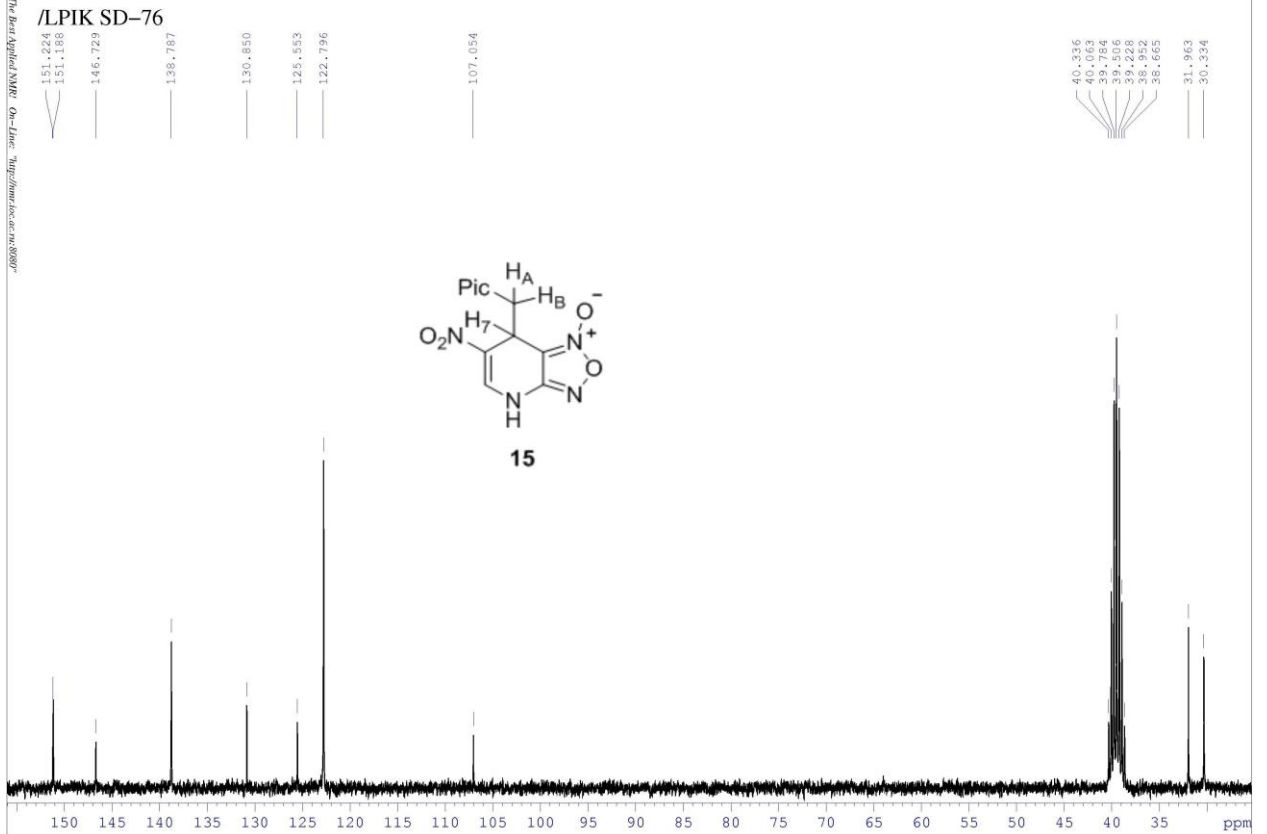

# Display Report

## Analysis Info

Analysis Name D:\Data\Kolotyrkina\2017\Starosotnikov\0926010.d  
Method tune\_low.m  
Sample Name /LPIK SD-81  
Comment C12H7N7O10 mH 410.0327 calibrant added

Acquisition Date 26.09.2017 12:32:11

Operator BDAL@DE  
Instrument / Ser# micrOTOF 10248

## Acquisition Parameter

|             |            |                      |          |                  |           |
|-------------|------------|----------------------|----------|------------------|-----------|
| Source Type | ESI        | Ion Polarity         | Positive | Set Nebulizer    | 0.4 Bar   |
| Focus       | Not active |                      |          | Set Dry Heater   | 180 °C    |
| Scan Begin  | 50 m/z     | Set Capillary        | 4500 V   | Set Dry Gas      | 4.0 l/min |
| Scan End    | 3000 m/z   | Set End Plate Offset | -500 V   | Set Divert Valve | Waste     |

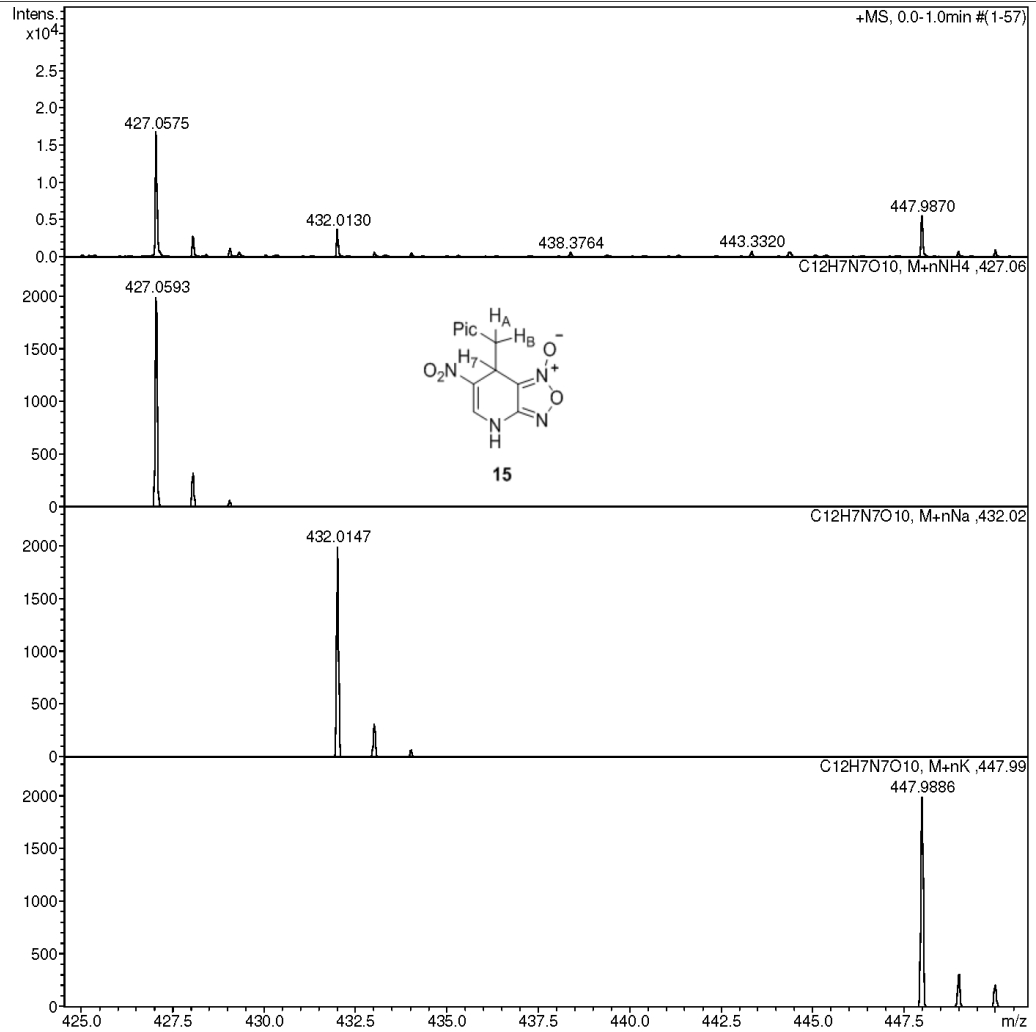

## X-ray diffraction experiments:

Data collection was performed on a Bruker APEX DUO diffractometer equipped with Apex II CCD detector and operating with Mo K $\alpha$  radiation ( $\lambda = 0.71073 \text{ \AA}$ ). Frames were integrated using the Bruker SAINT software package [SAINT (version 8.34A), Bruker AXS Inc., Madison, Wisconsin, USA, 2014] by a narrow-frame algorithm. A semiempirical absorption correction was applied with the SADABS program [G.M. Sheldrick, SADABS, v. 2008/1, Bruker/Siemens Area Detector Absorption Correction Program, Bruker AXS, Madison, Wisconsin, USA, 2008] using the intensity data of equivalent reflections. The structures were solved with direct methods and refined by the full-matrix least-squares technique against  $F^2_{\text{hkl}}$  in anisotropic approximation with SHELX [G.M. Sheldrick, Acta Cryst. 2015, C71, 3-8] software package. Hydrogen atoms connected to oxygen and nitrogen atoms were located from difference Fourier synthesis and refined isotropically. All other hydrogen atoms were placed in calculated positions and refined in riding model  $U_{\text{iso}}(\text{H})$  equal to  $1.5U_{\text{eq}}(\text{Cm})$  and  $1.2U_{\text{eq}}(\text{Ci})$ , where  $U_{\text{eq}}(\text{Cm})$  and  $1.2U_{\text{eq}}(\text{Ci})$  are respectively the equivalent thermal parameters of methyl and all other carbon atoms to which corresponding H atoms are bonded. Detailed crystallographic information is given in Tables S1 and S2. Crystallographic data have been deposited to the Cambridge Crystallographic Data Centre, CCDC numbers 1574256 (**12·DMF**) and 1574257 (**15·DMSO**), and can be retrieved free of charge via <https://www.ccdc.cam.ac.uk/structures>.

Table S1. Crystallographic data for 12·DMF and 15·DMSO.

|                                                                                           | (12·DMF)                                                      | (15·DMSO)                                                        |
|-------------------------------------------------------------------------------------------|---------------------------------------------------------------|------------------------------------------------------------------|
| Formula                                                                                   | C <sub>14</sub> H <sub>19</sub> N <sub>5</sub> O <sub>8</sub> | C <sub>14</sub> H <sub>13</sub> N <sub>7</sub> O <sub>11</sub> S |
| Formula weight                                                                            | 385.34                                                        | 487.37                                                           |
| <i>T</i> , K                                                                              | 120                                                           | 120                                                              |
| Crystal system                                                                            | monoclinic                                                    | monoclinic                                                       |
| Space group                                                                               | P2 <sub>1</sub> /c                                            | P2 <sub>1</sub> /n                                               |
| <i>Z</i> / <i>Z'</i>                                                                      | 4 / 1                                                         | 4 / 1                                                            |
| <i>a</i> , Å                                                                              | 11.138(2)                                                     | 10.9841(16)                                                      |
| <i>b</i> , Å                                                                              | 12.765(3)                                                     | 7.2477(11)                                                       |
| <i>c</i> , Å                                                                              | 12.649(2)                                                     | 24.162(3)                                                        |
| $\beta$ , °                                                                               | 103.045(4)                                                    | 99.107(3)                                                        |
| <i>V</i> , Å <sup>3</sup>                                                                 | 1752.1(6)                                                     | 1899.3(5)                                                        |
| <i>d</i> <sub>calc</sub> , g cm <sup>-3</sup>                                             | 1.461                                                         | 1.704                                                            |
| $\mu$ , cm <sup>-1</sup>                                                                  | 1.21                                                          | 2.52                                                             |
| $2\theta_{\max}$ , °                                                                      | 60.0                                                          | 60.0                                                             |
| Reflns. collected / independent                                                           | 22965 / 5112                                                  | 32671 / 5550                                                     |
| Observed reflections [ <i>I</i> >2 $\sigma$ ( <i>I</i> )]                                 | 3840                                                          | 4079                                                             |
| <i>R</i> <sub>1</sub>                                                                     | 0.0425                                                        | 0.0463                                                           |
| <i>wR</i> <sub>2</sub>                                                                    | 0.1153                                                        | 0.0986                                                           |
| GOF                                                                                       | 1.032                                                         | 1.045                                                            |
| Residual density, e Å <sup>-3</sup> ( <i>d</i> <sub>max</sub> / <i>d</i> <sub>min</sub> ) | 0.336/-0.271                                                  | 0.386/-0.350                                                     |



Table S2. Selected bond lengths (Å) in crystals **12·DMF** and **15·DMSO**.

|         | ( <b>12·DMF</b> ) | ( <b>15·DMSO</b> ) |
|---------|-------------------|--------------------|
| N1-C2   | 1.3610(18)        | 1.360(2)           |
| C2-C3   | 1.3486(19)        | 1.350(2)           |
| C3-C4   | 1.5175(17)        | 1.512(2)           |
| C4-C5   | 1.4972(18)        | 1.489(2)           |
| N7-C5   | 1.3104(16)        | 1.312(2)           |
| O8-N7   | 1.4482(15)        | 1.448(2)           |
| N7-O10  | 1.2301(14)        | 1.228(2)           |
| O8-N9   | 1.3994(15)        | 1.393(2)           |
| N9-C6   | 1.3068(17)        | 1.310(2)           |
| N1-C6   | 1.3710(17)        | 1.366(2)           |
| C5-C6   | 1.4110(18)        | 1.402(2)           |
| C4-C11  | 1.5250(18)        | 1.567(2)           |
| C11-C12 | 1.3687(19)        |                    |
| C11-C14 | 1.450(2)          |                    |
| O1-C14  | 1.2352(17)        |                    |
| O2-C14  | 1.3344(17)        |                    |
| O3-C12  | 1.3386(18)        |                    |
| C11-C12 |                   | 1.507(2)           |
| C12-C13 |                   | 1.389(2)           |
| C12-C17 |                   | 1.395(2)           |

## checkCIF/PLATON report

Structure factors have been supplied for datablock(s) sd76

THIS REPORT IS FOR GUIDANCE ONLY. IF USED AS PART OF A REVIEW PROCEDURE FOR PUBLICATION, IT SHOULD NOT REPLACE THE EXPERTISE OF AN EXPERIENCED CRYSTALLOGRAPHIC REFEREE.

No syntax errors found.    CIF dictionary    Interpreting this report

### Datablock: sd76

---

Bond precision:    C-C = 0.0022 Å                      Wavelength=0.71073

Cell:                      a=10.9841(16)              b=7.2477(11)              c=24.162(3)  
                            alpha=90                      beta=99.107(3)              gamma=90

Temperature:              120 K

|                | Calculated               | Reported                 |
|----------------|--------------------------|--------------------------|
| Volume         | 1899.3(5)                | 1899.3(5)                |
| Space group    | P 21/n                   | P 21/n                   |
| Hall group     | -P 2yn                   | -P 2yn                   |
| Moiety formula | C12 H7 N7 O10, C2 H6 O S | C12 H7 N7 O10, C2 H6 O S |
| Sum formula    | C14 H13 N7 O11 S         | C14 H13 N7 O11 S         |
| Mr             | 487.37                   | 487.37                   |
| Dx, g cm-3     | 1.704                    | 1.704                    |
| Z              | 4                        | 4                        |
| Mu (mm-1)      | 0.252                    | 0.252                    |
| F000           | 1000.0                   | 1000.0                   |
| F000'          | 1001.10                  |                          |
| h,k,lmax       | 15,10,33                 | 15,10,33                 |
| Nref           | 5550                     | 5550                     |
| Tmin,Tmax      | 0.964,0.980              | 0.827,0.862              |
| Tmin'          | 0.923                    |                          |

Correction method= # Reported T Limits: Tmin=0.827 Tmax=0.862  
AbsCorr = MULTI-SCAN

Data completeness= 1.000                      Theta(max)= 29.996

R(reflections)= 0.0463( 4079)              wR2(reflections)= 0.0986( 5550)

S = 1.045                      Npar= 323

---

The following ALERTS were generated. Each ALERT has the format  
**test-name** **ALERT** **alert-type** **alert-level**.  
Click on the hyperlinks for more details of the test.

---

**Alert level C**

|                   |                                           |             |
|-------------------|-------------------------------------------|-------------|
| PLAT230_ALERT_2_C | Hirshfeld Test Diff for O4 -- N2          | 6.3 s.u.    |
| PLAT906_ALERT_3_C | Large K value in the Analysis of Variance | 2.658 Check |

---

**Alert level G**

|                   |                                                  |              |
|-------------------|--------------------------------------------------|--------------|
| PLAT301_ALERT_3_G | Main Residue Disorder (Resd 1)                   | 7% Note      |
| PLAT395_ALERT_2_G | Deviating X-O-Y Angle from 120 Deg for O8        | 107.9 Degree |
| PLAT432_ALERT_2_G | Short Inter X...Y Contact O20" .. C14            | 2.91 Ang.    |
| PLAT720_ALERT_4_G | Number of Unusual/Non-Standard Labels            | 6 Note       |
| PLAT793_ALERT_4_G | The Model has Chirality at C4 (Centro SPGR)      | R Verify     |
| PLAT960_ALERT_3_G | Number of Intensities with I < - 2*sig(I)        | 8 Check      |
| PLAT978_ALERT_2_G | Number C-C Bonds with Positive Residual Density. | 13 Info      |

---

- 0 **ALERT level A** = Most likely a serious problem - resolve or explain  
0 **ALERT level B** = A potentially serious problem, consider carefully  
2 **ALERT level C** = Check. Ensure it is not caused by an omission or oversight  
7 **ALERT level G** = General information/check it is not something unexpected
- 0 ALERT type 1 CIF construction/syntax error, inconsistent or missing data  
4 ALERT type 2 Indicator that the structure model may be wrong or deficient  
3 ALERT type 3 Indicator that the structure quality may be low  
2 ALERT type 4 Improvement, methodology, query or suggestion  
0 ALERT type 5 Informative message, check
- 

It is advisable to attempt to resolve as many as possible of the alerts in all categories. Often the minor alerts point to easily fixed oversights, errors and omissions in your CIF or refinement strategy, so attention to these fine details can be worthwhile. In order to resolve some of the more serious problems it may be necessary to carry out additional measurements or structure refinements. However, the purpose of your study may justify the reported deviations and the more serious of these should normally be commented upon in the discussion or experimental section of a paper or in the "special\_details" fields of the CIF. checkCIF was carefully designed to identify outliers and unusual parameters, but every test has its limitations and alerts that are not important in a particular case may appear. Conversely, the absence of alerts does not guarantee there are no aspects of the results needing attention. It is up to the individual to critically assess their own results and, if necessary, seek expert advice.

#### Publication of your CIF in IUCr journals

A basic structural check has been run on your CIF. These basic checks will be run on all CIFs submitted for publication in IUCr journals (*Acta Crystallographica*, *Journal of Applied Crystallography*, *Journal of Synchrotron Radiation*); however, if you intend to submit to *Acta Crystallographica Section C* or *E* or *IUCrData*, you should make sure that full publication checks are run on the final version of your CIF prior to submission.

#### Publication of your CIF in other journals

Please refer to the *Notes for Authors* of the relevant journal for any special instructions relating to CIF submission.

PLATON version of 13/08/2017; check.def file version of 27/07/2017

Datablock sd76 - ellipsoid plot

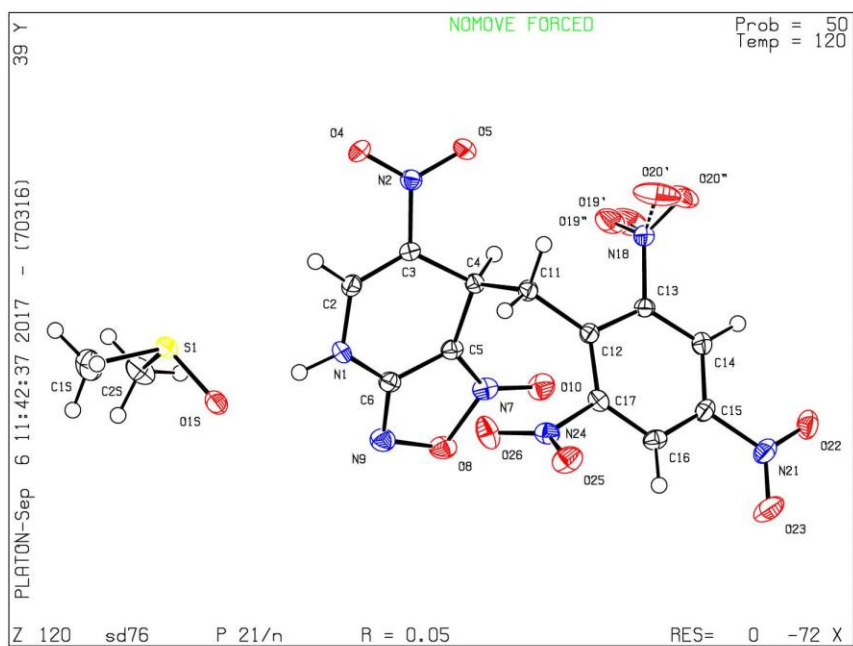

## checkCIF/PLATON report

Structure factors have been supplied for datablock(s) sd77

THIS REPORT IS FOR GUIDANCE ONLY. IF USED AS PART OF A REVIEW PROCEDURE FOR PUBLICATION, IT SHOULD NOT REPLACE THE EXPERTISE OF AN EXPERIENCED CRYSTALLOGRAPHIC REFEREE.

No syntax errors found.    CIF dictionary    Interpreting this report

### Datablock: sd77

---

Bond precision:    C-C = 0.0020 Å                      Wavelength=0.71073

Cell:                      a=11.138(2)              b=12.765(3)              c=12.649(2)  
                            alpha=90                      beta=103.045(4)              gamma=90

Temperature:              120 K

|                | Calculated               | Reported                 |
|----------------|--------------------------|--------------------------|
| Volume         | 1752.0(6)                | 1752.1(6)                |
| Space group    | P 21/c                   | P 21/c                   |
| Hall group     | -P 2ybc                  | -P 2ybc                  |
| Moiety formula | C11 H12 N4 O7, C3 H7 N O | C11 H12 N4 O7, C3 H7 N O |
| Sum formula    | C14 H19 N5 O8            | C14 H19 N5 O8            |
| Mr             | 385.34                   | 385.34                   |
| Dx, g cm-3     | 1.461                    | 1.461                    |
| Z              | 4                        | 4                        |
| Mu (mm-1)      | 0.121                    | 0.121                    |
| F000           | 808.0                    | 808.0                    |
| F000'          | 808.47                   |                          |
| h, k, lmax     | 15, 17, 17               | 15, 17, 17               |
| Nref           | 5111                     | 5112                     |
| Tmin, Tmax     | 0.961, 0.969             | 0.797, 0.862             |
| Tmin'          | 0.961                    |                          |

Correction method= # Reported T Limits: Tmin=0.797 Tmax=0.862  
AbsCorr = MULTI-SCAN

Data completeness= 1.000                      Theta(max)= 29.999

R(reflections)= 0.0425( 3840)                      wR2(reflections)= 0.1153( 5112)

S = 1.032                                      Npar= 256

---

The following ALERTS were generated. Each ALERT has the format  
**test-name ALERT alert-type alert-level.**  
Click on the hyperlinks for more details of the test.

---

|                        |                         |     |    |    |          |
|------------------------|-------------------------|-----|----|----|----------|
| <b>● Alert level C</b> |                         |     |    |    |          |
| PLAT230_ALERT_2_C      | Hirshfeld Test Diff for | O10 | -- | N7 | 5.3 s.u. |

---

|                        |                                                  |     |    |               |              |
|------------------------|--------------------------------------------------|-----|----|---------------|--------------|
| <b>● Alert level G</b> |                                                  |     |    |               |              |
| PLAT395_ALERT_2_G      | Deviating X-O-Y Angle from 120 Deg for           | O8  |    |               | 107.7 Degree |
| PLAT432_ALERT_2_G      | Short Inter X...Y Contact                        | O8  | .. | C18           | 3.00 Ang.    |
| PLAT432_ALERT_2_G      | Short Inter X...Y Contact                        | O10 | .. | C14           | 2.86 Ang.    |
| PLAT720_ALERT_4_G      | Number of Unusual/Non-Standard Labels            |     |    |               | 7 Note       |
| PLAT793_ALERT_4_G      | The Model has Chirality at C4                    |     |    | (Centro SPGR) | R Verify     |
| PLAT960_ALERT_3_G      | Number of Intensities with I < - 2*sig(I)        |     |    |               | 14 Check     |
| PLAT978_ALERT_2_G      | Number C-C Bonds with Positive Residual Density. |     |    |               | 11 Info      |

---

- 0 **ALERT level A** = Most likely a serious problem - resolve or explain  
0 **ALERT level B** = A potentially serious problem, consider carefully  
1 **ALERT level C** = Check. Ensure it is not caused by an omission or oversight  
7 **ALERT level G** = General information/check it is not something unexpected
- 0 ALERT type 1 CIF construction/syntax error, inconsistent or missing data  
5 ALERT type 2 Indicator that the structure model may be wrong or deficient  
1 ALERT type 3 Indicator that the structure quality may be low  
2 ALERT type 4 Improvement, methodology, query or suggestion  
0 ALERT type 5 Informative message, check
- 

It is advisable to attempt to resolve as many as possible of the alerts in all categories. Often the minor alerts point to easily fixed oversights, errors and omissions in your CIF or refinement strategy, so attention to these fine details can be worthwhile. In order to resolve some of the more serious problems it may be necessary to carry out additional measurements or structure refinements. However, the purpose of your study may justify the reported deviations and the more serious of these should normally be commented upon in the discussion or experimental section of a paper or in the "special\_details" fields of the CIF. checkCIF was carefully designed to identify outliers and unusual parameters, but every test has its limitations and alerts that are not important in a particular case may appear. Conversely, the absence of alerts does not guarantee there are no aspects of the results needing attention. It is up to the individual to critically assess their own results and, if necessary, seek expert advice.

#### Publication of your CIF in IUCr journals

A basic structural check has been run on your CIF. These basic checks will be run on all CIFs submitted for publication in IUCr journals (*Acta Crystallographica*, *Journal of Applied Crystallography*, *Journal of Synchrotron Radiation*); however, if you intend to submit to *Acta Crystallographica Section C* or *E* or *IUCrData*, you should make sure that full publication checks are run on the final version of your CIF prior to submission.

#### Publication of your CIF in other journals

Please refer to the *Notes for Authors* of the relevant journal for any special instructions relating to CIF submission.

---

PLATON version of 13/08/2017; check.def file version of 27/07/2017

Datablock sd77 - ellipsoid plot

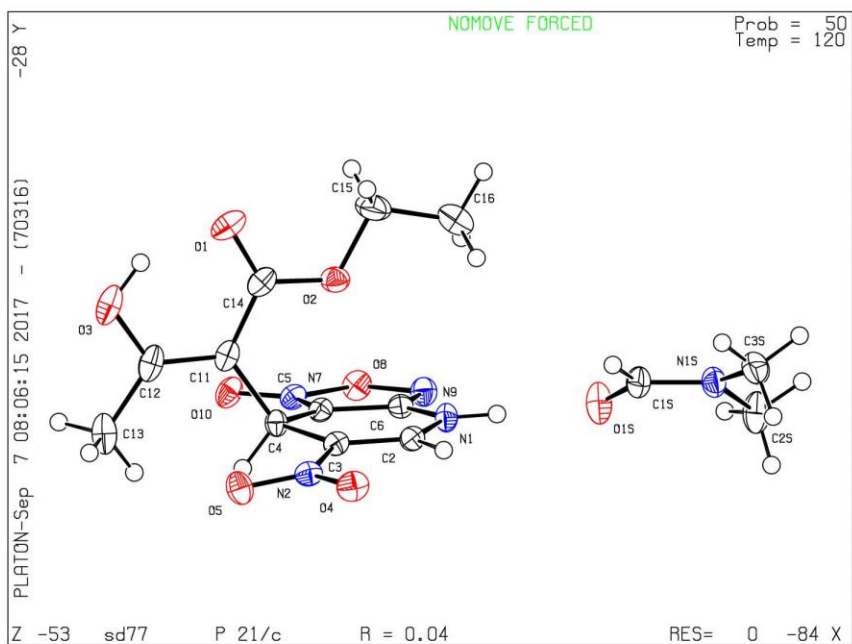

Supplement: Additional file 1 [file 1860-5397-13-277-S1.pdf]
